# Harnessing Empirical Bayes and Mendelian Segregation for Genotyping Autopolyploids from Messy Sequencing Data

David Gerard<sup>1</sup>, Luis Felipe Ventrone Ferrão<sup>2</sup>,  
Antonio Augusto Franco Garcia<sup>3</sup>, and Matthew Stephens<sup>1,4</sup>

<sup>1</sup>Department of Human Genetics, University of Chicago, Chicago, IL, 60637, USA

<sup>2</sup>Horticultural Sciences Department, University of Florida, Gainesville, FL, 32611, USA

<sup>3</sup>Department of Genetics, Luiz de Queiroz College of Agriculture, University of São Paulo, Piracicaba, SP, 03178-200, Brazil

<sup>4</sup>Department of Statistics, University of Chicago, Chicago, IL, 60637, USA

## Abstract

Detecting and quantifying the differences in individual genomes (i.e. genotyping), plays a fundamental role in most modern bioinformatics pipelines. Many scientists now use reduced representation next-generation sequencing (NGS) approaches for genotyping. Genotyping diploid individuals using NGS is a well-studied field and similar methods for polyploid individuals are just emerging. However, there are many aspects of NGS data, particularly in polyploids, that remain unexplored by most methods. We provide two main contributions in this paper: (i) We draw attention to, and then model, common aspects of NGS data: sequencing error, allelic bias, overdispersion, and outlying observations. (ii) Many datasets feature related individuals, and so we use the structure of Mendelian segregation to build an empirical Bayes approach for genotyping polyploid individuals. We assess the accuracy of our method in simulations and apply it to a dataset of hexaploid sweet potatoes (*Ipomoea batatas*). An R package implementing our method is available at <https://github.com/dcgerard/updog>.

## 1 Introduction

New high-throughput genotyping methods [e.g. Davey et al., 2011] allow scientists to pursue important genetic, ecological and evolutionary questions for any organism, even those for which existing genomic resources are scarce [Chen et al., 2014]. These methods combine high-throughput sequencing with preparation of a reduced representation library, to sequence a small subset of the entire genome across many individuals. This strategy allows both genome-wide single nucleotide polymorphism (SNP) discovery and SNP genotyping at a reduced cost compared to whole-genome sequencing [Chen et al., 2014, Kim et al., 2016]. Specific examples of these methods include “restriction site-associated DNA sequencing” (RAD-seq) [Baird et al., 2008] and “genotyping-by-sequencing” (GBS) [Elshire et al., 2011]. Both of which have been widely used in recent biological research, including in population-level analyses [Byrne et al., 2013, Schilling et al., 2014], quantitative trait loci mapping [Spindel et al., 2013], genomic prediction [Spindel et al., 2015], expression quantitative trait loci discovery [Liu et al., 2017], and genetic mapping studies [Shirasawa et al., 2017].

Statistical methods for SNP detection and genotype calling play a crucial role in these new genotyping technologies. And, indeed, considerable research has been performed to develop such methods [Nielsen et al., 2011]. Much of this research has focused on methods for diploid organisms — those with two copies of their genomes. Here, we focus on developing methods for polyploid organisms — specifically for autopolyploids,

---

*Keywords and phrases:* GBS, RAD-Seq, sequencing, classification, hierarchical modeling, read-mapping bias

which are organisms with more than two copies of their genome of the same type and origin [Garcia et al., 2013]. Autopolyploidy is a common feature in plants, including many important crops (e.g. sugarcane, potato, several forage crops, and some ornamental flowers). More generally, polyploidy plays a key role in plant evolution [Otto and Whitton, 2000, Soltis et al., 2014] and plant biodiversity [Soltis and Soltis, 2000], and understanding polyploidy is important when performing genomic selection to improve agricultural utility [Udall and Wendel, 2006]. Consequently there is strong interest in genotyping polyploid individuals, and indeed the last decade has seen considerable research into genotyping in both non-NGS data [Voorrips et al., 2011, Serang et al., 2012, Garcia et al., 2013, Bargary et al., 2014, Mollinari and Serang, 2015, Schmitz Carley et al., 2017] and NGS data [McKenna et al., 2010, Li, 2011, Garrison and Marth, 2012, Blischak et al., 2016, Maruki and Lynch, 2017, Blischak et al., 2018].

Here, we will demonstrate that current analysis methods, though carefully thought out, can be improved in several ways. Current methods fail to account for the fact that NGS data are inherently messy. Generally, samples are genotyped at low coverage to reduce cost [Glaubitz et al., 2014, Blischak et al., 2018], increasing variability. Errors in sequencing from the NGS platforms abound [Li et al., 2011] (Section 2.2). These are two well-known issues in NGS data. In this paper, we will further show that NGS data also face issues of systematic biases (e.g. resulting from the read-mapping step) (Section 2.3), added variability beyond the effects of low-coverage (Section 2.4), and the frequent occurrence of outlying observations (Section 2.5). Our first contribution in this paper is highlighting these issues on real data and then developing a method to account for them.

Our second contribution is to consider information from Mendelian segregation in NGS genotyping methods. Many experimental designs in plant breeding are derived from progeny test data [Li et al., 2014, Tennessen et al., 2014, McCallum et al., 2016, Shirasawa et al., 2017]. Such progenies often result from a biparental cross, including half and full-sib families, or from selfing. This naturally introduces a hierarchy that can be exploited to help genotype individuals with low coverage. Here, we implement this idea in the case of autopolyploids with polysomic inheritance and bivalent non-preferential pairing. Hierarchical modeling is a powerful statistical approach, and others have used its power in polyploid NGS data, not with Mendelian segregation, but in assuming Hardy-Weinberg equilibrium (HWE) or small deviations from HWE [Li, 2011, Garrison and Marth, 2012, Maruki and Lynch, 2017, Blischak et al., 2018]. Using Mendelian segregation for genotyping has been used in non-NGS data [Serang et al., 2012, Schmitz Carley et al., 2017], and in diploid NGS data [Zhou and Whittemore, 2012], but to our knowledge has not been implemented in polyploid NGS data — though others have used deviations from Mendelian segregation as a way to filter SNPs [Chen et al., 2014, e.g.].

Our paper is organized as follows. We develop our method using a real dataset [Shirasawa et al., 2017] as motivation in Section 2. During this development, we highlight several issues and solutions to genotyping NGS data, including overdispersion, allelic bias, and outlying observations. We then evaluate the performance of our method using Monte Carlo simulations (Section 3.1) and demonstrate its superior genotyping accuracy to competing methods in the presence of overdispersion and allelic bias. We then use our method on a real dataset of hexaploid sweet potato (*Ipomoea batatas*) in Section 3.3. We finish with a discussion and future directions (Section 4).

## 2 Methods

We now describe models and methods for genotyping polyploid individuals. The models incorporate several features we have observed in real data. To help highlight these features, and for ease of explanation, we start with a simple model and gradually incorporate each additional feature. Notation is introduced gradually as required, and summarized for convenience in Table 1.

To illustrate key features of our model we give examples from a dataset on autohexaploid sweet potato samples (*Ipomoea batatas*) ( $2n = 6x = 90$ ) from a genetic mapping study by Shirasawa et al. [2017]. These data consist of an S1 population of 142 individuals, genotyped using double-digest RAD-seq technology [Peterson et al., 2012]. Here and throughout, “S1” refers to a population of individuals produced from the self-pollination of a single parent. We used the data resulting from the SNP selection and filtering procedures

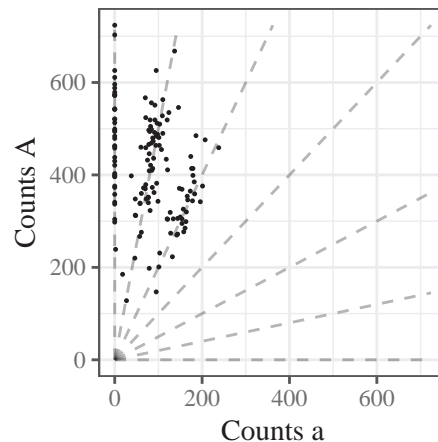

Figure 1: Genotype plot of single well-behaved SNP in a hexaploid species. Each point is an individual with the number of alternative reads along the  $x$ -axis and the number of reference reads along the  $y$ -axis. The dashed lines are defined by  $y/(x+y) = p$  for  $p \in \{0/6, 1/6, \dots, 6/6\}$ , which correspond to genotypes  $\{aaaaaa, Aaaaaa, \dots, AAAAAA\}$ .

described in Shirasawa et al. [2017]. These procedures included mapping reads onto a reference genome of the related *Ipomoea trifida* to identify putative SNPs and then selecting high-confidence bi-allelic SNPs with coverage of at least 10 reads for each sample and with less than 25% of samples missing, yielding a total of 94,361 SNPs. Further details of the biological materials, assays, and data filtering may be found in Shirasawa et al. [2017].

For each SNP, we use  $A$  and  $a$  to denote the two alleles, with  $A$  being the reference allele (defined by the allele on the reference genome of the related *Ipomoea trifida*). For each individual the data at each SNP are summarized as the number of reads carrying the  $A$  allele and the number carrying the  $a$  allele. For a  $K$ -ploid individual there are  $K+1$  possible genotypes, corresponding to  $0, 1, \dots, K$  copies of the  $A$  allele. We use  $p_i \in \{0/K, 1/K, \dots, K/K\}$  to denote the  $A$  allele dosage of individual  $i$  (so  $Kp_i$  is the number of copies of allele  $A$ ). Genotyping an individual corresponds to estimating  $p_i$ .

Figure 1 illustrates the basic genotyping problem using data from a single well-behaved SNP. In this “genotype plot” each point is an individual, with the  $x$  and  $y$  axes showing the number of  $a$  and  $A$  reads respectively. The lines in the plot indicate the expected values for possible genotype  $p_i \in \{0/K, 1/K, \dots, K/K\}$  and are defined by

$$\frac{A}{A+a} = p_i, \quad (1)$$

where  $A$  is the count of  $A$  reads and  $a$  is the count of  $a$  reads. Genotyping each sample effectively corresponds to determining which line gave rise to the sample’s data. In this case the determination is fairly clear because the SNP is particularly well-behaved and most samples have good coverage. Later we will see examples where the determination is harder.

## 2.1 Naive model

A simple and natural model is that the reads at a given SNP are independent Bernoulli random variables:

$$x_{ij}|p_i \sim \text{Bernoulli}(p_i), \quad (2)$$

Table 1: Summary of Notation.

|                       |                                                                                                                               |
|-----------------------|-------------------------------------------------------------------------------------------------------------------------------|
| $K$                   | The ploidy of the species.                                                                                                    |
| $x_{ij}$              | $j$ th read for $i$ th individual. Equal to 1 if a read is an A and 0 if a read is an a.                                      |
| $y_i$                 | $= \sum_j x_{ij}$ . The number of A reads in individual $i$ .                                                                 |
| $n_i$                 | The number of reads in individual $i$ .                                                                                       |
| $p_i$                 | The allele-dosage for individual $i$ , $p_i \in \{0/K, 1/K, \dots, K/K\}$ .                                                   |
| $\theta_i$            | The probability sample $i$ is a non-outlier.                                                                                  |
| $\tilde{y}_\ell$      | The number of A reads in the $\ell$ th parent.                                                                                |
| $\tilde{n}_\ell$      | The number of reads in the $\ell$ th parent.                                                                                  |
| $\tilde{p}_\ell$      | The allele-dosage for the $\ell$ th parent.                                                                                   |
| $\tilde{\theta}_\ell$ | The probability the sample from parent $\ell$ is a non-outlier.                                                               |
| $\epsilon$            | The sequencing error rate.                                                                                                    |
| $h$                   | The allelic bias parameter. $Pr(\mathbf{a} \text{ observed after selected})/Pr(\mathbf{A} \text{ observed after selected})$ . |
| $\tau$                | Overdispersion parameter for the read counts.                                                                                 |
| $\pi$                 | The proportion of samples that are non-outliers.                                                                              |

where  $x_{ij}$  is 1 if read  $j$  from individual  $i$  is an A allele and is 0 if the read is an a allele. The total counts of allele A in individual  $i$  then follows a binomial distribution

$$y_i = \sum_{j=1}^{n_i} x_{ij} \sim \text{Binomial}(n_i, p_i). \quad (3)$$

If the individuals are siblings then, by the rules of Mendelian segregation, the  $p_i$ 's have distribution [Serang et al., 2012]:

$$Pr(p_i = k/K | \tilde{p}_1 = \ell_1/K, \tilde{p}_2 = \ell_2/K) = \sum_{i=\max(\ell_1-K/2, k-\ell_2)}^{\min(\ell_1, K/2+k-\ell_2)} \text{HG}(i, K/2 | \ell_1, K) \text{HG}(k-i, K/2 | \ell_2, K), \quad (4)$$

where  $\tilde{p}_j$  is the A allele dosage of parent  $j$  and  $\text{HG}(a, b | c, d)$  is the hypergeometric probability mass function:

$$\text{HG}(a, b | c, d) = \frac{\binom{c}{a} \binom{d-c}{b-a}}{\binom{d}{b}}. \quad (5)$$

Equation (4) results from a convolution of two hypergeometric random variables. The distribution (4) effectively provides a prior distribution for  $p_i$ , given the parental genotypes. If the parental genotypes are known then this prior is easily combined with the likelihood (3) to perform Bayesian inference for  $p_i$ . If the parental genotypes are not known, then it is straightforward to estimate the parental genotypes by maximum likelihood, marginalizing out the  $p_i$ , yielding an empirical Bayes procedure.

## 2.2 Modeling sequencing error

Though model (2) is a reasonable starting point, it does not account for sequencing error. Even if sequencing errors rates are low (e.g. 0.5-1% [Li et al., 2011]), it is crucial to model them because a single error can otherwise dramatically impact genotype calls. In particular, if an individual truly has all reference alleles ( $p_i = 1$ ) then (in the model without errors) a single non-reference allele observed in error would yield a likelihood (and hence posterior probability) of 0 for the true genotype. Biologically, this means that a homozygous individual can be erroneously classified as heterozygous, which may impact downstream analyses. We demonstrate this in Figure 2 where in the right panel we fit the model described in Section 2.1 to a single SNP. We labeled 6 points on Figure 2 with triangles that we think intuitively have a genotype of

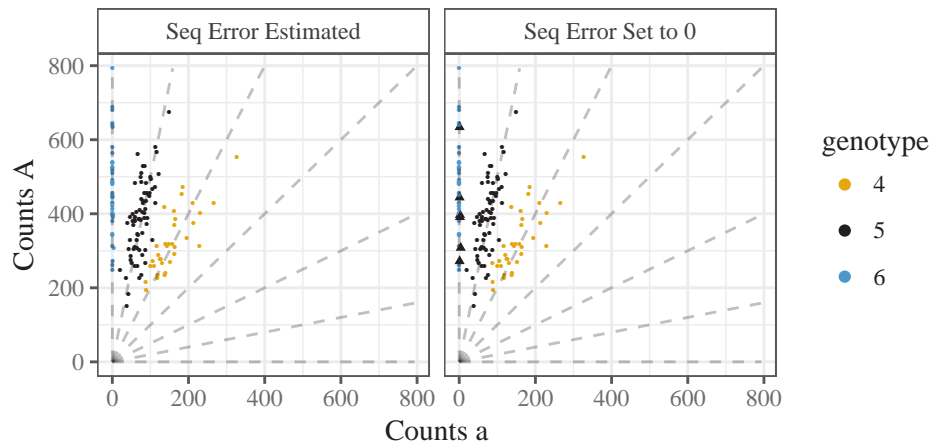

Figure 2: Two genotype plots demonstrating the need to model sequencing error. A SNP genotyped in conjunction with estimating the sequencing error rate (left panel) or by setting the sequencing error rate to 0 (right panel). Triangles are points that we think look mis-classified.

AAAAAA but were classified as having a genotype of AAAAAa due to the occurrence of one or two a reads.

To incorporate sequencing error, we replace (3) with

$$y_i \sim \text{Binomial}(n_i, f(p_i, \epsilon)), \quad (6)$$

where

$$f(p_i, \epsilon) = p_i(1 - \epsilon) + (1 - p_i)\epsilon, \quad (7)$$

and  $\epsilon$  denotes the sequencing error rate. Estimating this error rate in conjunction while fitting the model in Section 2.1 results in intuitive genotyping for the SNP in Figure 2 (left panel). This approach is also used by Li [2011] (and seems more principled than the alternative in Li et al. [2014]); see also Maruki and Lynch [2017] for extensions to multi-allelic SNPs.

## 2.3 Modeling allelic bias

We now address another common feature of these data: systematic bias towards one allele or the other. This is exemplified by the central panel of Figure 3. At first glance, it appears that all offspring have either 5 or 6 copies of the reference allele. However, this is unlikely to be the case: since this is an S1 population, if the parent had 5 copies of the reference allele, we would expect, under Mendelian segregation, the genotype proportions to be (0.25, 0.5, 0.25) for 6, 5, and 4 copies of the reference allele, respectively. Indeed, the proportion of individuals with greater than 95% of their read-counts being the reference allele is 0.197 — relatively close to the 0.25 expected proportion for genotype AAAAAA (one-sided  $p$ -value = 0.085). That leaves the other points to represent a mixture of AAAAAa and AAAAAa genotypes. Thus, for this SNP there appears to be bias toward observing an A read compared to an a read.

One possible source of this bias is the read mapping step [Van De Geijn et al., 2015]. For example, if one allele provides a better match to a different location on the genome than the true location then this decreases its probability of being mapped correctly. Van De Geijn et al. [2015] describe a clever and simple technique to adjust for allele-specific bias during the read-mapping step. However, we see three possible problems that may be encountered in using the approach of Van De Geijn et al. [2015]: (i) in some instances, a researcher may not have access to the raw data files to perform this procedure; (ii) the procedure requires access to a reference genome, which is unavailable for many organisms [Lu et al., 2013]; (iii) there could plausibly be other sources of bias, requiring the development of a method agnostic to the source of bias.

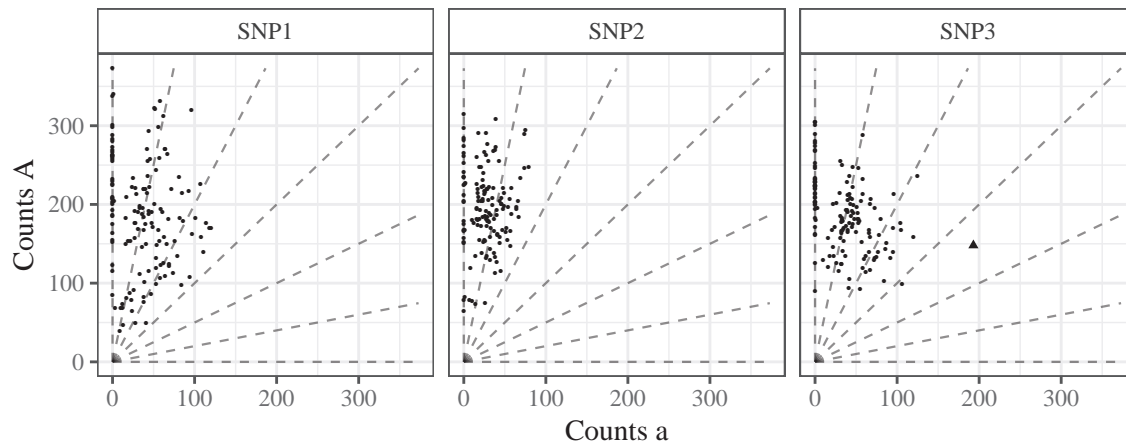

Figure 3: Three genotype plots of SNPs demonstrating common features of the data from Shirasawa et al. [2017], considering autohexaploid sweet potato: Overdispersion (left), bias (middle), and outlying observations (right).

To account for allelic bias, we model sequencing as a two stage procedure: first, reads are chosen to be sequenced (assumed independent of allele); and, second, chosen reads are either “observed” or “not observed” with probabilities that may depend on the allele they carry. Let  $x_{ij}$  denote the random variable that is 1 if the chosen read carries an A allele, and 0 otherwise; and let  $u_{ij}$  denote the random variable that is 1 if the chosen read is actually observed and 0 otherwise. To model the first stage we use

$$[x_{ij}|p_i, \epsilon] \sim \text{Bernoulli}(f(p_i, \epsilon)). \quad (8)$$

To model the second stage we assume

$$[u_{ij}|x_{ij}, c, d] \sim \begin{cases} \text{Bernoulli}(c) & \text{if } x_{ij} = 1 \\ \text{Bernoulli}(d) & \text{if } x_{ij} = 0. \end{cases} \quad (9)$$

Allelic bias occurs when  $c \neq d$ . Since we can only determine the alleles of the reads we observe, we are interested in the distribution of  $x_{ij}$  conditioned on  $u_{ij} = 1$ , which is given by Bayes rule:

$$[x_{ij}|u_{ij} = 1, p_i, \epsilon, c, d] \sim \text{Bernoulli}(\xi(p_i, \epsilon, c, d)), \quad (10)$$

$$\xi(p_i, \epsilon, c, d) = \frac{cf(p_i, \epsilon)}{d(1 - f(p_i, \epsilon)) + cf(p_i, \epsilon)}. \quad (11)$$

Notice that  $\xi$  depends on  $c$  and  $d$  only through the ratio  $h := d/c$ . Specifically:

$$\xi(p_i, \epsilon, h) = \frac{f(p_i, \epsilon)}{h(1 - f(p_i, \epsilon)) + f(p_i, \epsilon)}. \quad (12)$$

We refer to  $h$  as the “bias parameter”, which represents the relative probability of a read carrying the two different alleles being observed after being chosen to be sequenced. For example, a value of  $h = 1/2$  means that an A read is twice as probable to be correctly observed than an a read, while a value of  $h = 2$  means that an a read is twice as probable to be correctly observed than an A read.

Both the bias parameter  $h$  and the sequencing error rate  $\epsilon$  modify the expected allele proportions for each genotype. However, they do so in different ways: lower values of  $h$  push the means toward the upper left of the genotype plot, while higher values push the means toward the lower right. Higher values of  $\epsilon$  tend

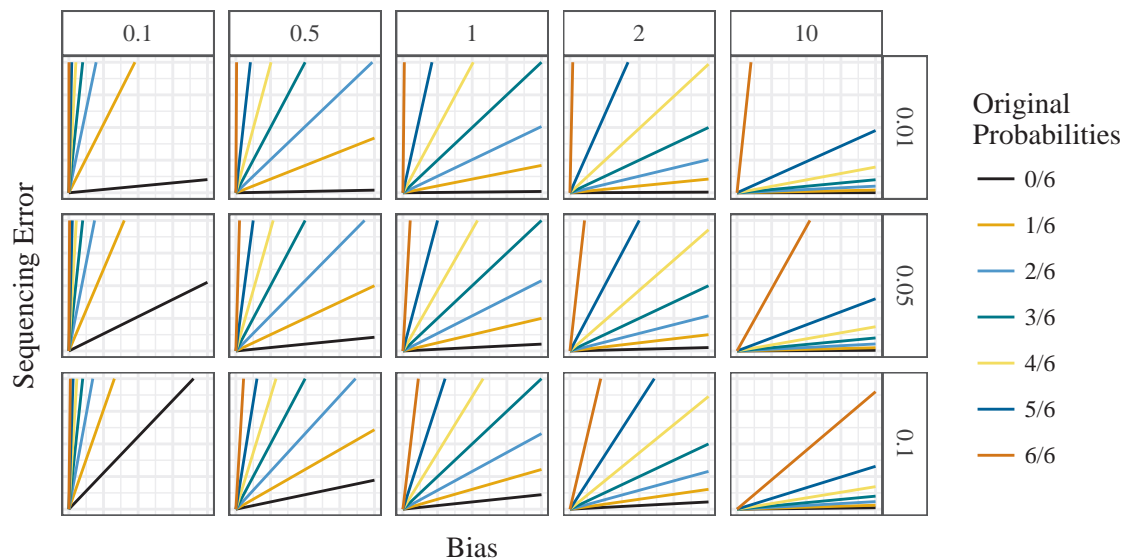

Figure 4: Mean counts of the mapped-reads under different levels of sequencing error rates (row facets) and different levels of allelic bias (column facets), considering an autohexaploid locus. The  $y$ -axis is the number of reference counts and the  $x$ -axis is the number of alternative counts.

to squeeze the means toward each other. These different effects are illustrated in Figure 4.

## 2.4 Modeling overdispersion

Overdispersion refers to additional variability than expected under a simple model. Overdispersion is a common feature in many datasets. In sequencing experiments overdispersion could be introduced by variation in the processing of a sample, by variations in a sample’s biochemistry, or by added measurement error introduced by the sequencing machine. These could all result in observed read-counts being more dispersed than expected under the simple binomial model (3). Figure 5 (which is an annotated version of the left panel in Figure 3) illustrates overdispersion in these data.

To model overdispersion we replace the binomial model with a beta-binomial model [Skellam, 1948]. The beta-binomial model assumes that each individual draws their own individual-specific mean probability from a beta-distribution, then draws their counts conditional on this probability:

$$[q_i | p_i, \epsilon, h, \tau] \sim \text{Beta} \left( \xi(p_i, \epsilon, h) \frac{1 - \tau}{\tau}, [1 - \xi(p_i, \epsilon, h)] \frac{1 - \tau}{\tau} \right) \quad (13)$$

$$[y_i | n_i, q_i] \sim \text{Binomial}(n_i, q_i). \quad (14)$$

Here  $\xi(p_i, \epsilon, h)$  (12) is the mean of the underlying beta-distribution and  $\tau \in [0, 1]$  is the overdispersion parameter, with values closer to 0 indicating less overdispersion and values closer to 1 indicating greater overdispersion. (The parameter  $\tau$  can also be interpreted as the “intra class correlation” [Crowder, 1979].) The  $q_i$ ’s are dummy variables representing individual specific probabilities and are integrated out in the following analyses. We denote the marginal distribution of  $y_i$  as

$$[y_i | n_i, p_i, \epsilon, h, \tau] \sim \text{BB}(n_i, \xi(p_i, \epsilon, h), \tau). \quad (15)$$



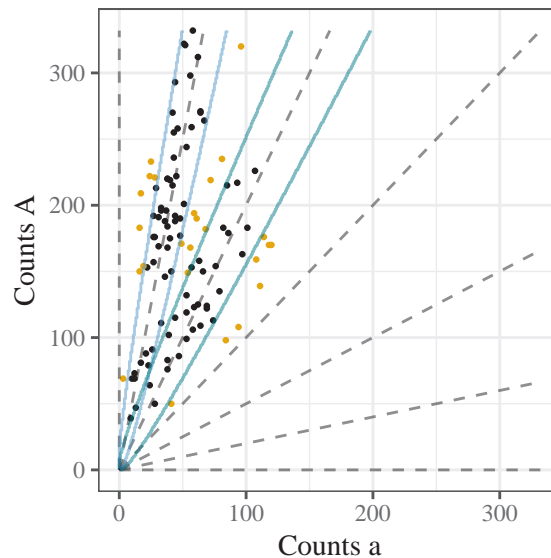

Figure 5: A genotype plot illustrating overdispersion compared with the simple binomial model. This figure shows the same SNP as the left panel of Figure 3 but with the points with greater than 95% A reads removed. Solid lines indicate the 0.025 and 0.975 quantiles for the Binomial distribution with probabilities 4/6 (green) and 5/6 (blue). Points that lie within these lines are colored black; outside are colored orange. Under the binomial model only 5% of the points should be orange, but in fact a significantly higher proportion (23.6%;  $p$ -value  $1.2 \times 10^{-11}$ ) are orange.

## 2.5 Modeling outliers

The right panel of Figure 3 illustrates another important feature of real data: outliers. Here, most of the points appear well-behaved, but one point (marked as a triangle) is far from the remaining points. Furthermore, taking account of the fact that these data came from an S1 population, this outlying point is inconsistent with the other points. This is because the other points strongly suggest that the parental genotype is AAAAAa, meaning that the possible genotypes are AAAAAA, AAAAAa, and AAAAaa, and the triangle lies far from the expectation for any of these genotypes. Indeed, under a fitted beta-binomial model, if the individual's genotype were AAAAaa, then the probability of seeing as few or fewer A counts in this individual as were actually observed is  $8.7 \times 10^{-6}$  (Bonferroni-corrected  $p$ -value of 0.0012). There are many possible sources of outliers like this, including individual-specific quirks in the amplification or read-mapping steps, and sample contamination or mislabeling.

There are several common strategies for dealing with outliers. These include using methods that are inherently robust to outliers [Huber, 1964]; identifying and removing outliers prior to analysis [Hadi and Simonoff, 1993]; or modeling the outliers directly [Aitkin and Wilson, 1980]. Here we take this last approach, which has the advantage of providing measures of uncertainty for each point being an outlier.

Specifically, we model outliers using a mixture model:

$$[y_i | n_i, p_i, \epsilon, h, \tau, \pi] \sim \pi \text{BB}(n_i, \xi(p_i, \epsilon, h), \tau) + (1 - \pi) \text{BB}(n_i, 1/2, 1/3), \quad (16)$$

where  $\pi$  represents the proportion of points that are not outliers. Here the second component of this mixture represents the outliers, and the parameters (1/2, 1/3) of this outlying distribution were chosen so that the underlying beta distribution is uniform on [0, 1]. (We also tried estimating the underlying beta parameters for the outlying distribution, but we found that this can overfit the data in some instances; not shown.)



## 2.6 Prior on sequencing error rate and bias parameter

In some cases we found that maximum likelihood estimation of the bias parameter  $h$  and error rate  $\epsilon$  gave estimates that were unrealistic, and lead to undesirable results. For example, we often observed this problem at SNPs where all individuals carry the same genotype (i.e. monomorphic markers).

Figure 6A shows an example of this problem for simulated data from an autotetraploid species in which an AAAA parent is crossed with a aaaa parent, which results in all offspring having the same genotype AAaa. Using the model described up to now yields a maximum likelihood estimate of sequencing error rate  $\hat{\epsilon} = 0.44$ , which is unrealistically high. This further creates very poor genotype calls (Figure 6B).

To avoid this problem we place a prior on  $\epsilon$  to capture the fact that  $\epsilon$  will usually be small. Specifically we use

$$\text{logit}(\epsilon) \sim N(\mu_\epsilon, \sigma_\epsilon^2), \quad (17)$$

with software defaults  $\mu_\epsilon = -4.7$  and  $\sigma_\epsilon^2 = 1$ . With these defaults, 95% of the prior mass is on  $\epsilon \in [0.0012, 0.061]$ .

Ideally one would incorporate this prior distribution into a full Bayesian model, and integrate over the resulting posterior distribution on  $\epsilon$ . However this would require non-trivial computation, and we take the simpler approach of simply multiplying the likelihood by the prior (17) and maximizing this product in place of the likelihood. (Effectively this corresponds to optimizing a penalized likelihood.) See Section 2.9 for details.

A similar problem can occur with the bias parameter,  $h$ . For example, in the simulated example, and with the prior (17) on  $\epsilon$ , the maximum likelihood estimate for  $h$  is unrealistically small ( $\hat{h} = 0.0054$ ), again resulting in poor genotype calls (Figure 6C). To avoid this we also place a prior on  $h$ :

$$\log(h) \sim N(\mu_h, \sigma_h^2), \quad (18)$$

with software defaults  $\mu_h = 0$  and  $\sigma_h^2 = 0.7^2$ . With these defaults, 95% of the prior mass is on  $h \in [0.25, 4.1]$ , which we believe generously spans the range of biases that generally occur. (See also Figure 12 for graphical depictions.) Again we incorporate the prior by multiplying it by the likelihood and optimizing the resulting product (Section 2.9).

Using both these priors results in accurate genotypes for our simulated example (Figure 6D).

## 2.7 Incorporating parental reads

In studies involving parents and offspring researchers almost always have NGS data on parent(s) as well as offspring. Such data can be easily incorporated into our model.

Specifically we model the number of A reads in parent  $\ell$  (denoted  $\tilde{y}_\ell$ ) given the total number of reads in parent  $\ell$  (denoted  $\tilde{n}_\ell$ ) and allelic dosage  $p_\ell$  by:

$$[\tilde{y}_\ell | \tilde{n}_\ell, \tilde{p}_\ell, \epsilon, h, \tau, \pi] \sim \pi \text{BB}(\tilde{n}_\ell, \xi(\tilde{p}_\ell, \epsilon, h), \tau) + (1 - \pi) \text{BB}(\tilde{n}_\ell, 1/2, 1/3). \quad (19)$$

We treat the parental read count data as independent of the offspring count data (given the underlying genotypes), so the model likelihood is the product of (19) and (6).

## 2.8 Screening SNPs

No matter the modeling decisions made, there will likely be poorly-behaved SNPs whose genotypes are unreliable. Such poorly behaved SNPs may originate from sequencing artifacts. It is important to consider identifying and removing such SNPs. We have found (e.g. Section 3.1) that the estimated overdispersion parameter in our model is a useful summary of how well-behaved the SNP is: large estimated overdispersion often indicates poor accuracy of estimated genotypes. For this reason we suggest researchers consider removing SNPs with large estimated overdispersion. In our software, we have also implemented the ability

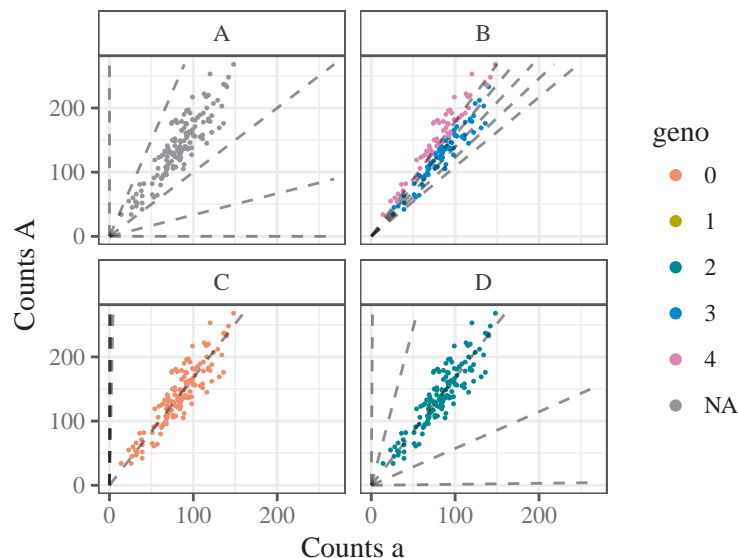

Figure 6: Four genotype plots illustrating the need to place priors on the bias and sequencing error rate parameters. Simulated autotetraploid NGS data where all individuals have the AAaa genotype. (A) unlabeled NGS data, (B) labeled by a fit without any penalties on the bias and sequencing error rate, (C) labeled by a fit with a penalty only on the sequencing error rate, and (D) labeled by a fit with penalties on both the bias and the sequencing error rate.

to simulate data under the fitted model. Plotting the simulated data and comparing it to the observed data could be a useful informal way to gauge the fit of the model.

## 2.9 Final model and expectation maximization algorithm

We now summarize our final model and fitting procedure.

Our final model is:

$$[y_i | n_i, p_i = k_i/K, \epsilon, h, \tau, \pi] \sim \pi \text{BB}(n_i, \xi(k_i/K, \epsilon, h), \tau) + (1 - \pi) \text{BB}(n_i, 1/2, 1/3), \quad (20)$$

$$[\tilde{y}_j | \tilde{n}_j, \tilde{p}_j = \ell_j/K, \epsilon, h, \tau, \pi] \sim \pi \text{BB}(\tilde{n}_j, \xi(\ell_j/K, \epsilon, h), \tau) + (1 - \pi) \text{BB}(\tilde{n}_j, 1/2, 1/3) \quad (21)$$

$$Pr(p_i = k_i/K | \tilde{p}_1 = \ell_1/K, \tilde{p}_2 = \ell_2/K) = \sum_{i=\max(\ell_1-K/2, k_i-\ell_2)}^{\min(\ell_1, K/2+k_i-\ell_2)} \text{HG}(i, K/2 | \ell_1, K) \text{HG}(k_i - i, K/2 | \ell_2, K), \quad (22)$$

$$\text{logit}(\epsilon) \sim N(\mu_\epsilon, \sigma_\epsilon^2), \quad (23)$$

$$\log(h) \sim N(\mu_h, \sigma_h^2). \quad (24)$$

To fit this model for offspring from two shared parents (an F1 cross) we first estimate  $\epsilon$ ,  $h$ ,  $\tau$ ,  $\pi$ ,  $\ell_1$ , and  $\ell_2$  via maximum likelihood (or, for  $h$ ,  $\epsilon$ , the posterior mode):

$$\begin{aligned} \arg \max_{(\epsilon, h, \tau, \pi, \ell_1, \ell_2) \in [0,1] \times \mathbb{R}^+ \times [0,1] \times [0,1] \times 0:K \times 0:K} & p(h)p(\epsilon)p(\tilde{y}_1 | \tilde{n}_1, \ell_1/K, \epsilon, h, \tau, \pi)p(\tilde{y}_2 | \tilde{n}_2, \ell_2/K, \epsilon, h, \tau, \pi) \\ & \times \prod_i \sum_{k_i=0}^K p(y_i | n_i, k_i/K, \epsilon, h, \tau, \pi)p(k_i/K | \ell_1/K, \ell_2/K). \end{aligned} \quad (25)$$

We perform this maximization using an expectation maximization (EM) algorithm, presented in Algorithm

1. The M-step (31) involves a quasi-Newton optimization for each possible combination of  $\ell_1$  and  $\ell_2$ , which we implement using the `optim` function in R [R Core Team, 2017].

Given estimates  $\hat{\epsilon}$ ,  $\hat{h}$ ,  $\hat{\tau}$ ,  $\hat{\pi}$ ,  $\hat{\ell}_1$ , and  $\hat{\ell}_2$ , we use Bayes' Theorem to obtain the posterior probability of the individuals' genotypes:

$$Pr(p_i = k_i/K | n_i, \hat{\epsilon}, \hat{h}, \hat{\tau}, \hat{\pi}, \hat{\ell}_1, \hat{\ell}_2) = \frac{p(y_i | n_i, k_i/K, \hat{\epsilon}, \hat{h}, \hat{\tau}, \hat{\pi}) Pr(p_i = k_i/K | \tilde{p}_1 = \hat{\ell}_1/K, \tilde{p}_2 = \hat{\ell}_2/K)}{\sum_{k_i=0}^K p(y_i | n_i, k_i/K, \hat{\epsilon}, \hat{h}, \hat{\tau}, \hat{\pi}) Pr(p_i = k_i/K | \tilde{p}_1 = \hat{\ell}_1/K, \tilde{p}_2 = \hat{\ell}_2/K)}. \quad (26)$$

From this we can obtain, for example, the posterior mean genotype or a posterior mode genotype for each individual. The  $\theta_i$ 's from the E-step in (28) may be interpreted as the posterior probability that a point is a non-outlier.

Modifying Algorithm 1 to deal with offspring from an S1 (instead of F1) cross is straightforward: simply constrain  $\ell_1 = \ell_2$  and remove  $p(\tilde{y}_2 | \tilde{n}_2, \ell_2/K, \epsilon, h, \tau, \pi)$  from (25).

This procedure is implemented in the R package `updog` (Using Parental Data for Offspring Genotyping).

---

**Algorithm 1** `updog` EM algorithm for an F1 cross.

---

1: Let (see (4))

$$a_{k_i \ell_1 \ell_2} := Pr(p_i = k_i/K | \tilde{p}_1 = \ell_1/K, \tilde{p}_2 = \ell_2/K). \quad (27)$$

2: E-Step: Set

$$\theta_i := \frac{\pi \sum_{k_i=0}^K BB(y_i | n_i, \xi(k_i/K, \epsilon, h), \tau) a_{k_i \ell_1 \ell_2}}{\pi \sum_{k_i=0}^K BB(y_i | n_i, \xi(k_i/K, \epsilon, h), \tau) a_{k_i \ell_1 \ell_2} + (1 - \pi) BB(y_i | n_i, 1/2, 1/3)} \quad (28)$$

$$\tilde{\theta}_j := \frac{\pi BB(\tilde{y}_j | \tilde{n}_j, \xi(\ell_j/K, \epsilon, h), \tau)}{\pi BB(\tilde{y}_j | \tilde{n}_j, \xi(\ell_j/K, \epsilon, h), \tau) + (1 - \pi) BB(\tilde{y}_j | \tilde{n}_j, 1/2, 1/3)} \quad (29)$$

3: M-Step: Set

$$\pi = \frac{1}{N + 2} \left( \tilde{\theta}_1 + \tilde{\theta}_2 + \sum_{i=1}^N \theta_i \right) \quad (30)$$

$$\begin{aligned} (\ell_1, \ell_2, \tau, h, \epsilon) = & \arg \max_{(\ell_1, \ell_2, \tau, h, \epsilon) \in 1:K \times 1:K \times [0,1] \times \mathbb{R}^+ \times [0,1]} \left[ \sum_{i=1}^N \theta_i \log \sum_{k_i=0}^K BB(y_i | n_i, \xi(k_i/K, \epsilon, h), \tau) a_{k_i \ell_1 \ell_2} \right. \\ & + \tilde{\theta}_1 \log BB(\tilde{y}_1 | \tilde{n}_1, \xi(\ell_1/K, \epsilon, h), \tau) + \tilde{\theta}_2 \log BB(\tilde{y}_2 | \tilde{n}_2, \xi(\ell_2/K, \epsilon, h), \tau) \\ & \left. - \frac{1}{2\sigma_h^2} (\log(h) - \mu_h)^2 - \log(h) - \frac{1}{2\sigma_\epsilon^2} (\text{logit}(\epsilon) - \mu_\epsilon)^2 - \log(\epsilon) - \log(1 - \epsilon) \right], \end{aligned} \quad (31)$$

where

$$\xi(p_i, \epsilon, h) = \frac{f(p_i, \epsilon)}{f(p_i, \epsilon) + h(1 - f(p_i, \epsilon))}, \quad (32)$$

$$f(p_i, \epsilon) = (1 - \epsilon)p_i + \epsilon(1 - p_i). \quad (33)$$


---

## 2.10 Extension to population studies

We have focused here on data from an F1 (or S1) experimental design, using parental information to improve genotype calls. However, a similar approach can also be applied to other samples (e.g. outbred populations) by replacing the prior on offspring genotypes (4) with another suitable prior. For example, previous studies have used a discrete uniform distribution [McKenna et al., 2010], a binomial distribution that results from assuming HWE [Li, 2011, Garrison and Marth, 2012], and a Balding-Nichols beta-binomial model on the genotypes [Balding and Nichols, 1995, 1997] that assumes an individual contains the same overdispersion parameter across loci [Blischak et al., 2018]. (All of these previous methods use models that are more limited than the one we present here: none of them account for allelic bias, outliers, or locus-specific overdispersion; and most implementations assume the sequencing error rate is known.)

In our software we have implemented both the uniform and binomial (HWE) priors on genotypes. The former is very straightforward. The latter involves modifying Algorithm 1 by replacing  $a_{k_i \ell_1 \ell_2}$  in (27) with the binomial probability  $Pr(k_i | n_i, \alpha)$ , where  $\alpha$  is the allele-frequency of A, and then optimizing over  $(\alpha, \tau, h, \epsilon)$  in (31).

## 3 Results

### 3.1 Simulation comparing updog with method of Li [2011]

We ran simulations to evaluate updog’s ability to estimate model parameters and genotype individuals in hexaploid species. Since most competing methods do not allow for an F1 population of individuals (though see Serang et al. [2012] implemented at <https://bitbucket.org/orserang/supermassa.git>), we compared the HWE version of updog (Section 2.10) to the method of Li [2011], as implemented by Blischak et al. [2018]. Other methods are either specific to tetraploids, or only have implementations for tetraploids [Voorrips et al., 2011, Schmitz Carley et al., 2017, Maruki and Lynch, 2017], so we did not explore their performances.

Specifically, we simulated 142 unrelated individuals (the number of individuals in the dataset from Shirasawa et al. [2017]) under the updog model with sequencing error rate  $\epsilon = 0.005$ , overdispersion parameter  $\tau \in \{0, 0.01, 0.05\}$ , and bias parameter  $h \in \{0.25, 0.5, 0.75, 1\}$ . These parameter values were motivated by features in real data (Figure 17). We did not allow for outliers, neither in the simulated data nor in the fit. For each combination of  $\tau$  and  $h$ , we simulated 1000 datasets. The  $n_i$ ’s were obtained from the 1000 SNPs in the Shirasawa et al. [2017] dataset with the largest read-counts. The distribution of the genotypes for each locus was binomially distributed using an allele frequency chosen from a uniform grid from 0.05 to 0.95.

Figure 7 contains boxplots for parameter estimates from the updog model. In general, the parameter estimates are highly accurate for small values of overdispersion and become less accurate, though still approximately unbiased, for larger values of overdispersion. The accuracy of the parameter estimates vary gradually for different levels of allele frequencies (Figures 13, 14, and 15). As the amount of overdispersion is the primary driver on the accuracy on the updog parameter estimates, using the estimated overdispersion parameter to screen SNPs appears to be a sound strategy. We note that in real data we rarely observe estimates of the overdispersion parameter higher than 0.05 (Figure 17).

We then compared the genotyping accuracy of updog with the method from Li [2011] as implemented by Blischak et al. [2018]. In Figure 8 we plot the allele frequency on the  $x$ -axis against the proportion of samples genotyped correctly on the  $y$ -axis, color coding by method. We fit smooth lines through the clouds of points. We have the following conclusions:

1. Overdispersion generally makes estimating genotypes much more difficult and accurate genotyping can only be guaranteed for small levels of overdispersion.
2. When there is any bias, updog has much superior performance.
3. Even when there is no bias, updog performs as well as the method of Li [2011], except for some datasets where the allele frequency is close to 0.5 and the overdispersion is large.

Even though the genotyping results are not encouraging for large amounts of overdispersion, updog has some ability to estimate this level of overdispersion to provide information to researchers on the quality of a SNP (Figure 7).

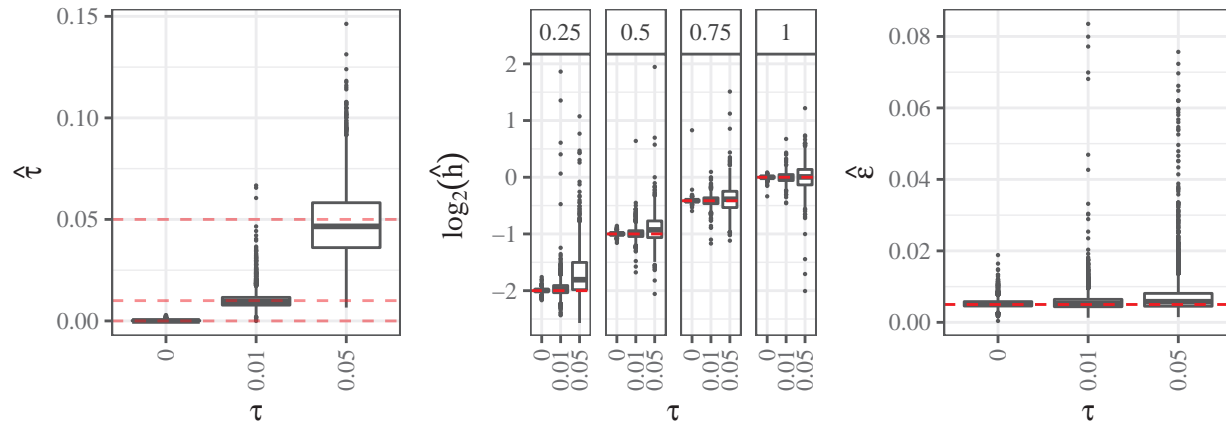

Figure 7: Left: Box plots of estimated overdispersion parameter ( $y$ -axis) stratified by the value of overdispersion ( $x$ -axis). The horizontal lines are at 0, 0.01, and 0.05. Center: Box plots of  $\log_2$ -transformed estimates of the bias parameter ( $y$ -axis) stratified by the value of overdispersion ( $x$ -axis). The column facets distinguish different levels of the true bias parameter. The horizontal lines are at the true bias parameter. Right: Box plots of estimated sequencing error rate ( $y$ -axis) stratified by the value of overdispersion ( $x$ -axis). The horizontal line is at the true sequencing error rate of 0.005.

Finally, we compared the allele frequency estimates from **updog** and the method of Li [2011]. Here, the results are more encouraging (Figure 9). Even for large levels of overdispersion and bias, **updog** accurately estimates the allele frequency (though less accurately than with small overdispersion). As expected, the method of Li [2011] is adversely affected by bias, which it does not model, and tends to overestimate the allele frequency in the direction of the bias.

### 3.2 Simulation comparing use of S1 prior and HWE prior

We ran simulations to evaluate the gains in sharing information between siblings in an S1 population. We drew the genotypes of an S1 population of 142 individuals where the parent contains either 3, 4, or 5 copies of the reference allele. We then simulated these individuals' read-counts under the **updog** model using the same parameter settings as in Section 3.1:  $\epsilon = 0.005$ ,  $\tau \in \{0, 0.01, 0.05\}$ , and  $h \in \{0.25, 0.5, 0.75, 1\}$ . For each combination of parental genotype, overdispersion, and allelic bias, we simulated 1000 datasets. The  $n_i$ 's were again obtained from the 1000 SNPs in the Shirasawa et al. [2017] dataset with the largest read-counts.

For each dataset, we fit **updog** using a prior that either assumes the individuals were from an S1 population (Section 2.9) or were in HWE (Section 2.10). We plot summaries of the proportion of individuals genotyped correctly across datasets on Figure 10. In every combination of parameters, correctly assuming an S1 prior improves performance, particularly when there is a small amount of overdispersion ( $\tau = 0.01$ ). Box plots of the proportion of individuals genotyped correctly may be found in Figure 16.

### 3.3 Sweet potato

We fit the Balding-Nichols version of the method of Blischak et al. [2018], the method of Serang et al. [2012] (implemented in the SuperMASSA software at <http://statgen.esalq.usp.br/SuperMASSA/>), and **updog** to the SNPs presented in Figure 3. The Balding-Nichols model that Blischak et al. [2018] uses has parameters that are shared across loci to estimate the genotype distributions of the SNPs, so we actually fit the method of Blischak et al. [2018] on the 1000 SNPs with the most read-counts and just present the results for the three SNPs from Figure 3. As the method of Blischak et al. [2018] requires the sequencing error rate to be known, we use the sequencing error rate estimates provided by **updog**.

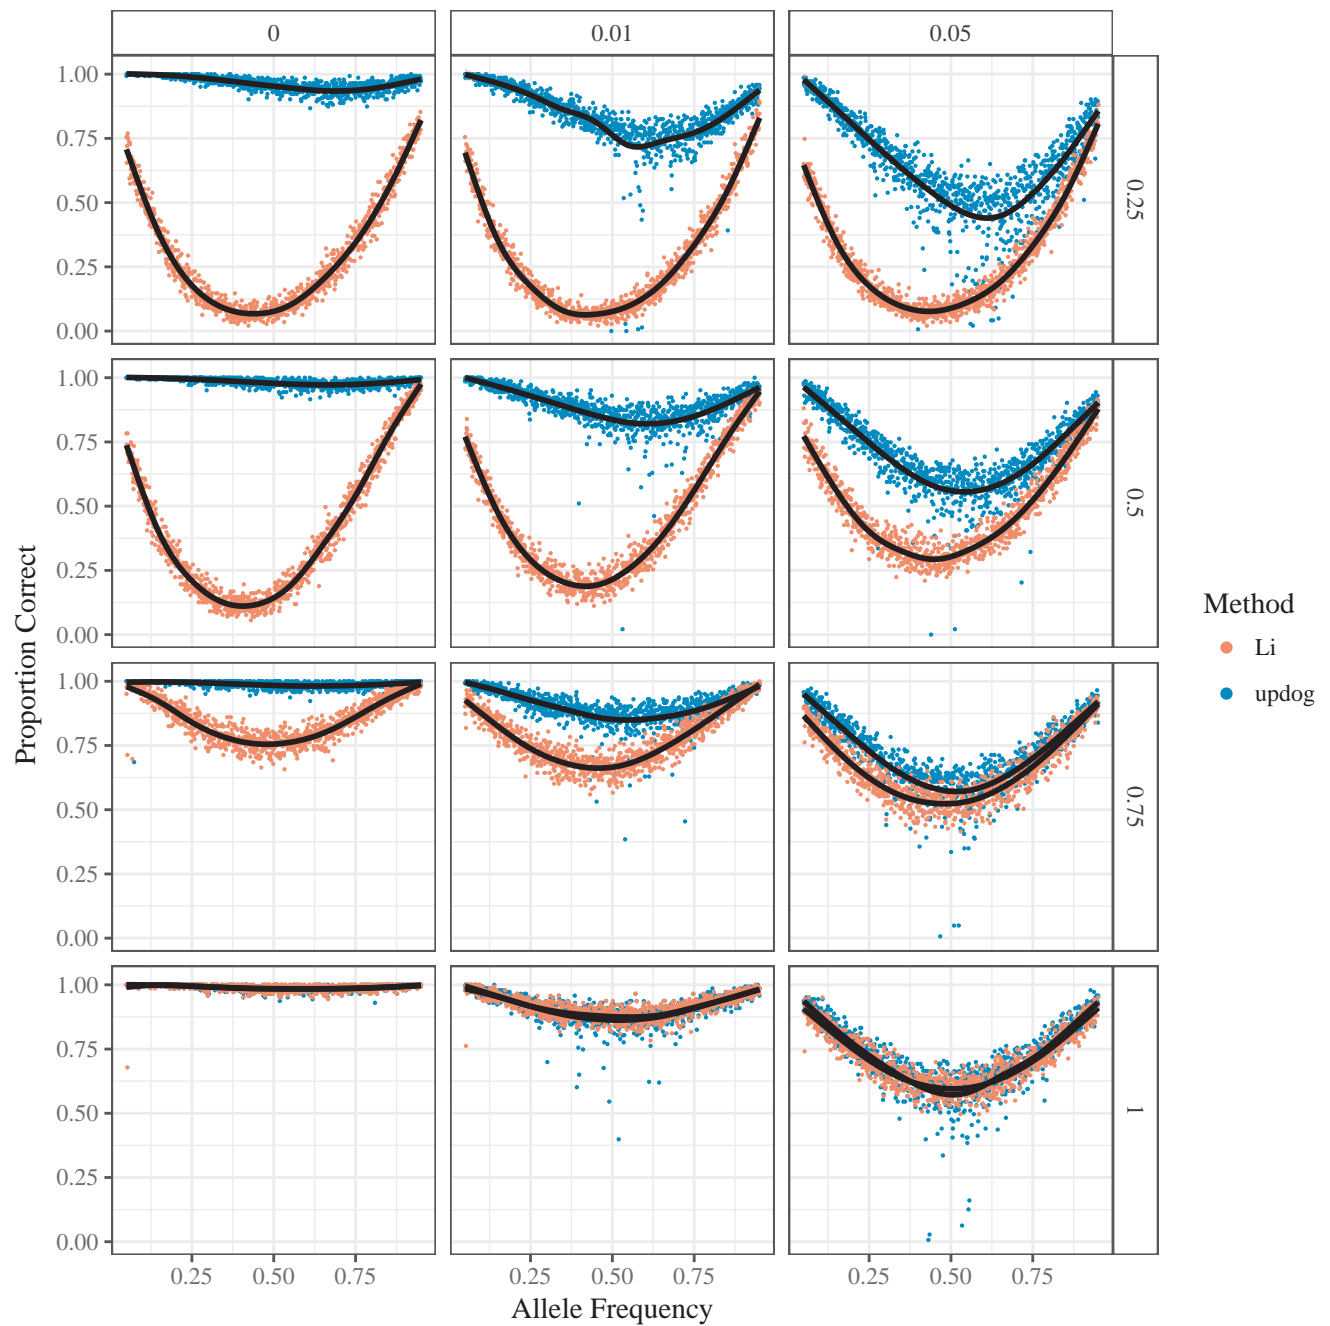

Figure 8: Proportion of individuals correctly genotyped ( $y$ -axis) for the updog method (blue) and the method of Li [2011] (red) versus true allele-frequency ( $x$ -axis). A smooth generalized additive model was fit to the results of both methods (black lines). The column facets distinguish between different levels of the overdispersion parameter and the row facets distinguish between different levels of the bias parameter.

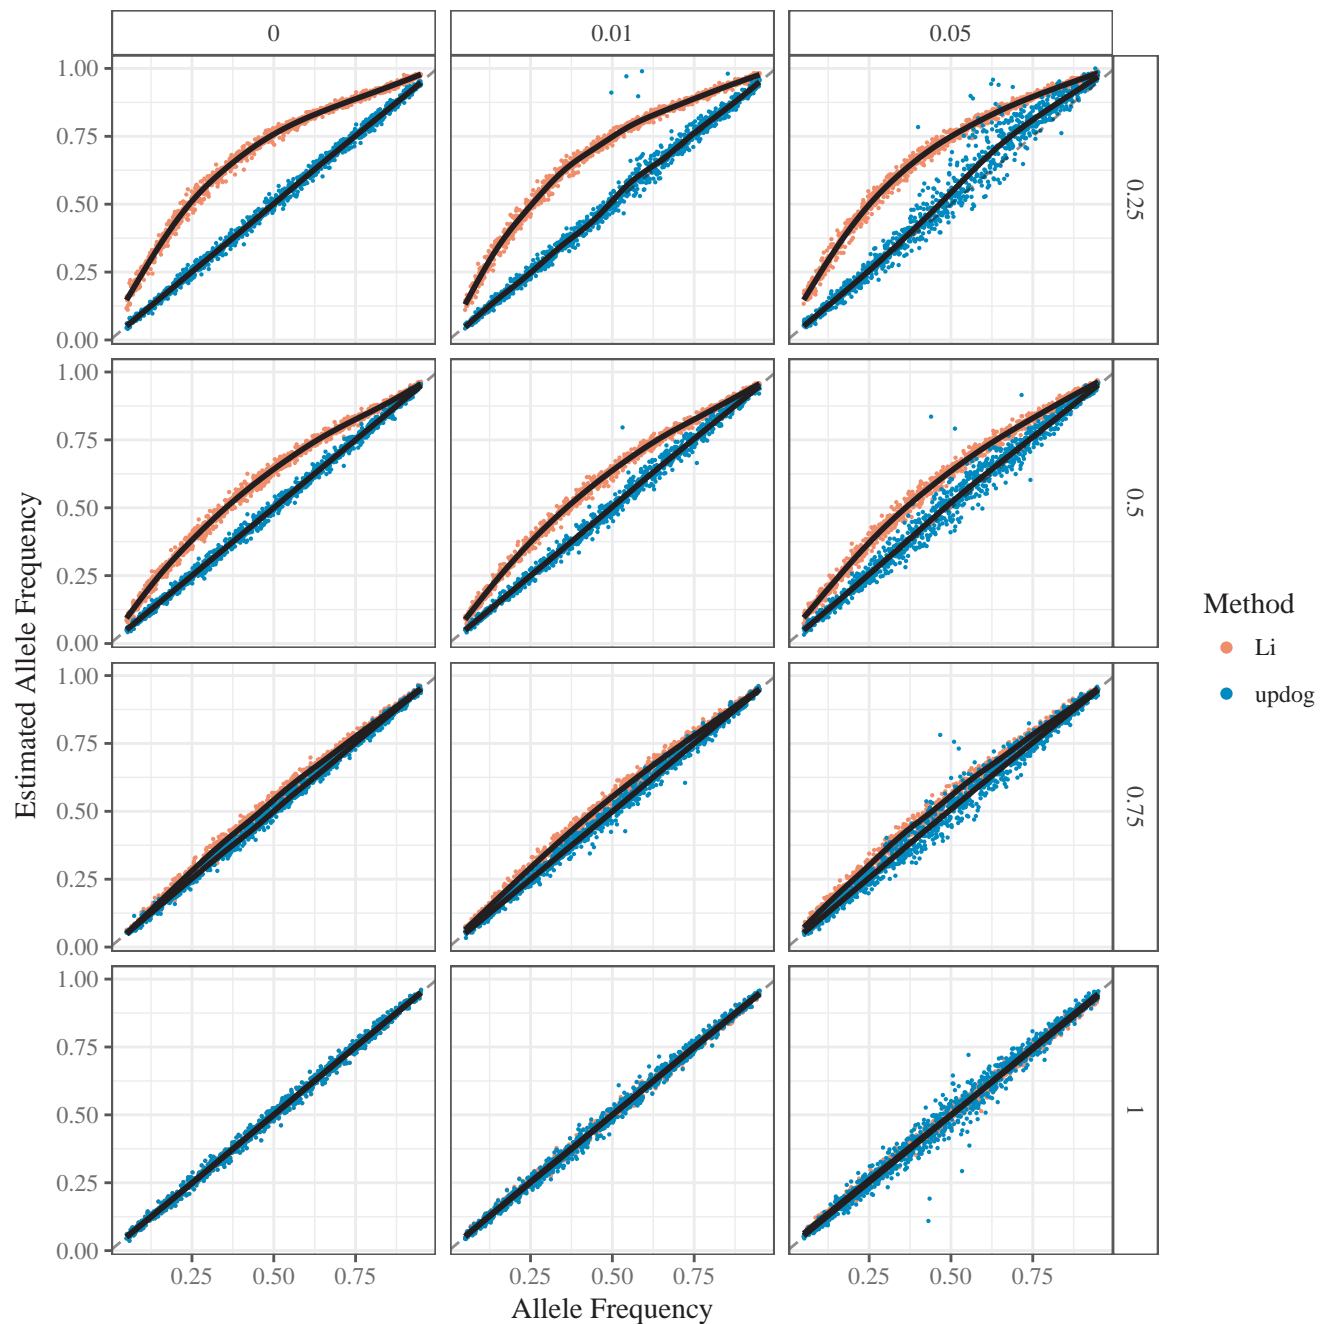

Figure 9: Estimated allele frequency ( $y$ -axis) for the **updog** method (blue) and the method of Li [2011] (red) versus true allele-frequency ( $x$ -axis). An unbiased method would result in most points lying along the  $y = x$  line. A smooth generalized additive model was fit to the results of both methods (black lines). The column facets distinguish between different levels of the overdispersion parameter and the row facets distinguish between different levels of the bias parameter.



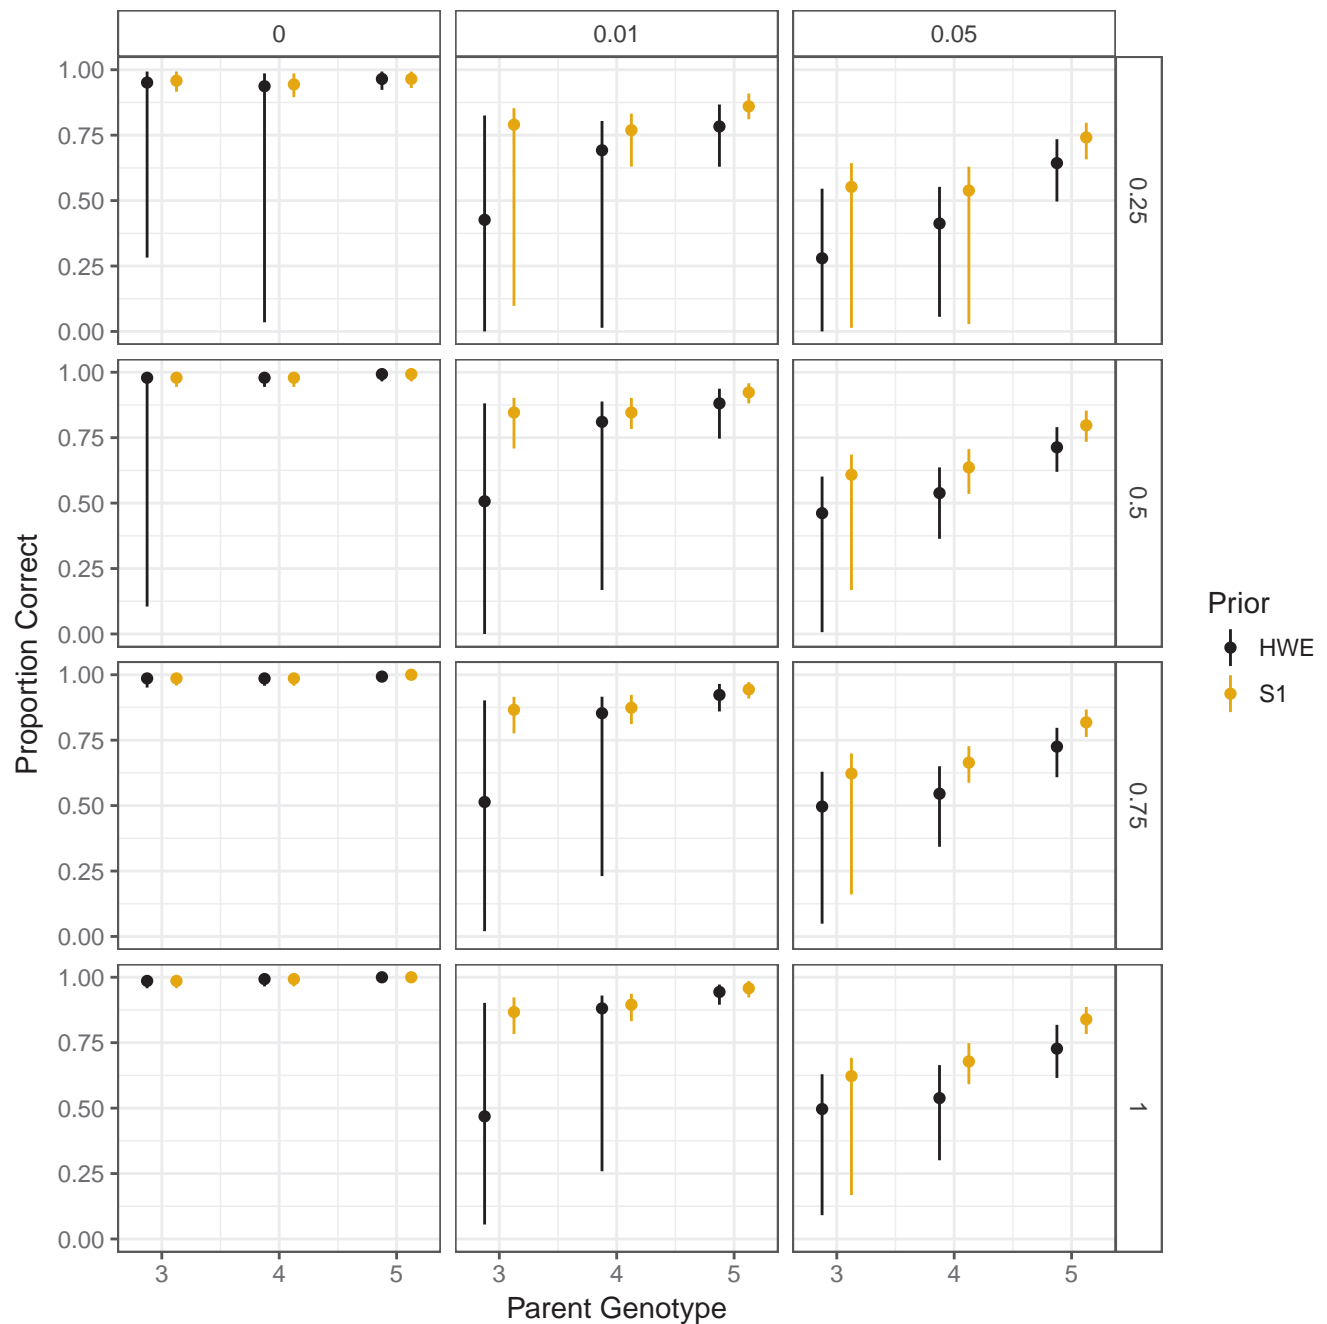

Figure 10: The 0.05, 0.5, and 0.95 quantiles (across datasets) of the proportion of individuals genotyped correctly in an updog fit ( $y$ -axis) stratified by parent genotype ( $x$ -axis). Column facets distinguish different levels of sequencing error rates while row facets distinguish different levels of overdispersion. Orange intervals correctly assume the individuals are from an S1 population while black intervals incorrectly assume the population is in Hardy-Weinberg equilibrium.

The fits for all three methods can be seen in Figure. 11. Our conclusions are:

1. [Serang et al. \[2012\]](#) and [Blischak et al. \[2018\]](#) provide unintuitive results for SNP2. As we know this is an S1 population, the genotype distribution should be closer to a 1:2:1 ratio for genotypes AAAAAA, AAAAAa, and AAAAaa. Only **updog** correctly accounts for this, and it does so by estimating an extreme bias.
2. The method of [Serang et al. \[2012\]](#) was designed for Gaussian, not count, data and as such provides some unintuitive genotyping. In particular, for SNPs 1 and 2 we see a few points on the left end of the AAAAAa genotypes that are coded AAAAAA when these could probably only result from an extreme sequencing error rate given that genotype.
3. The point in SNP3 that we have described as an outlier is removed by **updog**. The other methods are not able to cope with outliers.

### 3.4 Computation time

We measured the computation time required to fit **updog** to the 1000 SNPs with the highest read-depth from the dataset of [Shirasawa et al. \[2017\]](#). These computations were run on a 4.0 GHz quad-core PC running Linux with 32 GB of memory. It took on average 4.2 seconds per SNP to fit **updog**, with 95% of the runs taking between 3.3 and 5.2 seconds. This is much larger than the total time of 121 seconds it took for the software of [Blischak et al. \[2018\]](#) to fit their model on all 1000 SNPs. However, since the SNPs in **updog** are fitted independently, this allows us to easily parallelize this computation over the SNPs.

## 4 Discussion

We have developed an empirical Bayes genotyping procedure that takes into account common aspects of NGS data: sequencing error, allelic bias, overdispersion, and outlying points. We have shown that accounting for allelic bias is vital for accurate genotyping, and that the amount of overdispersion is a good measure for the quality of the genotyping for a SNP. We confirmed the validity of our method on simulated and real data.

We have focused on a dataset that has a relatively large read-coverage and contains a large amount of known structure (via Mendelian segregation). In many datasets, one would expect to have much lower coverage of SNPs and less structure [[Blischak et al., 2018](#)]. For such data, we do not expect the problems of allelic bias, overdispersion, and outlying points to disappear. From our simulations, the most insidious of these issues to ignore is the allelic bias. If a reference genome is available, then it might be possible to correct for the read-mapping bias by using the methods from [Van De Geijn et al. \[2015\]](#). However, this might not be the total cause of allelic bias. And without a reference genome, it is important to model this bias directly. We do not expect small coverage SNPs to contain enough information to accurately estimate the bias using our methods. For such SNPs, more work is needed. It might be possible to borrow strength between SNPs to develop accurate genotyping methods.

We have assumed that the ploidy is known and constant between individuals. However, some species (e.g. sugarcane) can have different ploidies per individual [[Garcia et al., 2013](#)]. If one has access to good cytological information on the ploidy of each individual, it would not be conceptually difficult to modify **updog** to allow for different (and known) ploidies of the individuals. However, estimating the ploidy might be more difficult, particularly in the presence of allelic bias. In the presence of such bias, one can imagine that it would be difficult to discern if a sample's location on a genotype plot was due to bias or due to a higher or lower ploidy level. More work would be needed to develop an approach that works with individuals having unknown ploidy levels. [Serang et al. \[2012\]](#) attempts to estimate the ploidy level in Gaussian data, but they do not jointly account for allele bias, which we hypothesize would bias their genotyping results.

The prior (4) assumed a particular form of meiotic segregation — autopolyploids with polysomic inheritance and bivalent non-preferential pairing. If working with a species with different meiotic behavior, one should adjust this prior accordingly.

[Garrison and Marth \[2012\]](#) uses a multinomial likelihood to model multiallelic haplotypes. This allows for more complex genotyping beyond SNPs. The models presented here could be easily extended to a

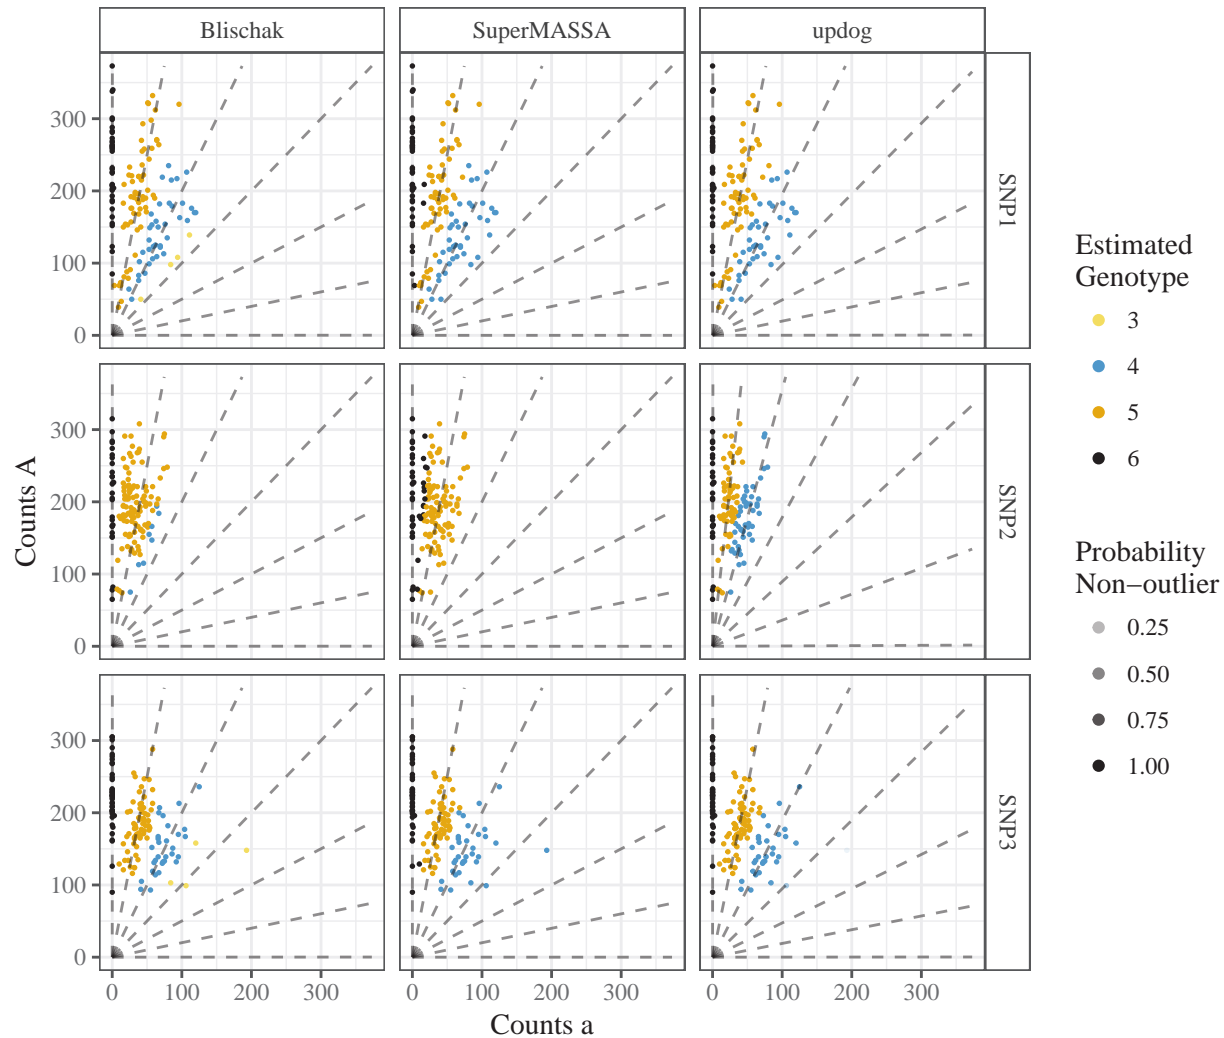

Figure 11: Genotype plots as in Figure 3 but color-coded by the estimated genotypes from the method of Blischak et al. [2018], the method of Serang et al. [2012], or updog (column facets). The row facets distinguish between the different SNPs. Transparency is proportional to the probability of being an outlier (only for updog).

multinomial likelihood. For example, to model bias with  $k$  possible alleles, one could introduce  $k - 1$  bias parameters which measure the bias of each allele relative to a reference allele. One could use a Dirichlet-multinomial distribution to model overdispersion and a uniform-multinomial distribution (uniform on the standard  $k - 1$  simplex) to model outliers. Modeling allele-detection errors (corresponding to sequencing errors in our NGS setup) would be context-specific.

The methods developed here may also be useful for genotyping diploid individuals. We are not aware of diploid genotyping methods that account for allelic bias, overdispersion, and outlying points. However, accounting for these features is probably more important for polyploid species, as determining allele dosage is more difficult than determining heterozygosity/homozygosity.

Genotyping is typically only one part of a large analysis pipeline. It is known that genotyping errors can inflate genetic maps [Hackett and Broadfoot, 2003], but it remains to determine the impact of dosage estimates on other downstream analyses. In principle one would want to integrate out uncertainty in estimated dosages, but in diploid analyses it is much more common to ignore uncertainty in genotypes and simply use the posterior mean genotype — for example, in GWAS analyses [Guan and Stephens, 2008]. It may be that similar ideas could work well for GWAS in polyploid species (see also Grandke et al. [2016]).

The methods implemented in this paper are available in the `updog` R package, available at

<https://github.com/dcgerard/updog>

Code to reproduce all of the results of this paper is available at

[https://github.com/dcgerard/reproduce\\_genotyping](https://github.com/dcgerard/reproduce_genotyping)

## 5 Acknowledgments

We sincerely thank the authors of Shirasawa et al. [2017] for providing their data and Paul Blischak for providing useful comments. D. Gerard and M. Stephens were supported by NIH grant HG002585 and by a grant from the Gordon and Betty Moore Foundation (Grant GBMF #4559). L. F. V. Ferrão and A.A.F. Garcia were partially supported by grant 2014/20389-2, FAPESP/CAPES (São Paulo Research Foundation). A.A.F. Garcia was supported by a productivity scholarship from the National Council for Scientific and Technological Development (CNPq).

## A Supplementary figures

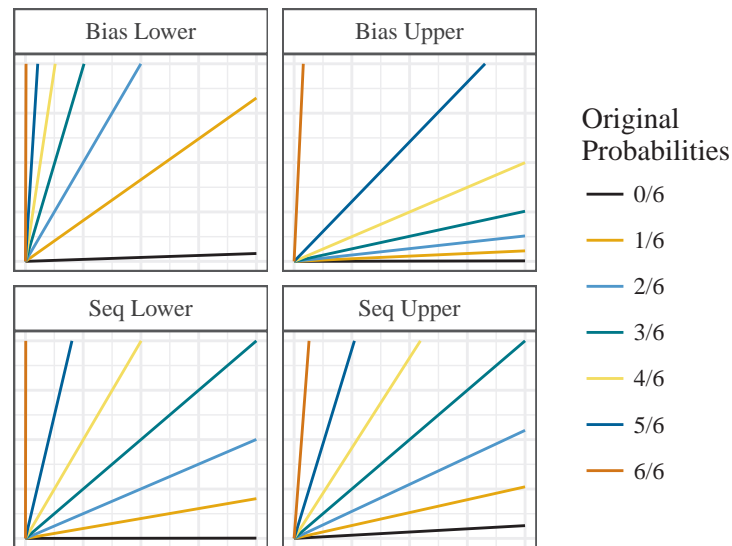

Figure 12: Considering an autohexaploid loci, -2 standard deviations of the bias parameter under our default prior (with a sequencing error rate of 0.01) (top left), +2 standard deviations of the bias parameter under our default prior (with a sequencing error rate of 0.01) (top right), -2 standard deviations of the sequencing error rate under our default prior (with a bias parameter of 1) (bottom left), +2 standard deviations of the sequencing error rate under our default prior (with a bias parameter of 1) (bottom right). The  $x$ -axis is the number of alternative reads and the  $y$ -axis is the number of reference reads.

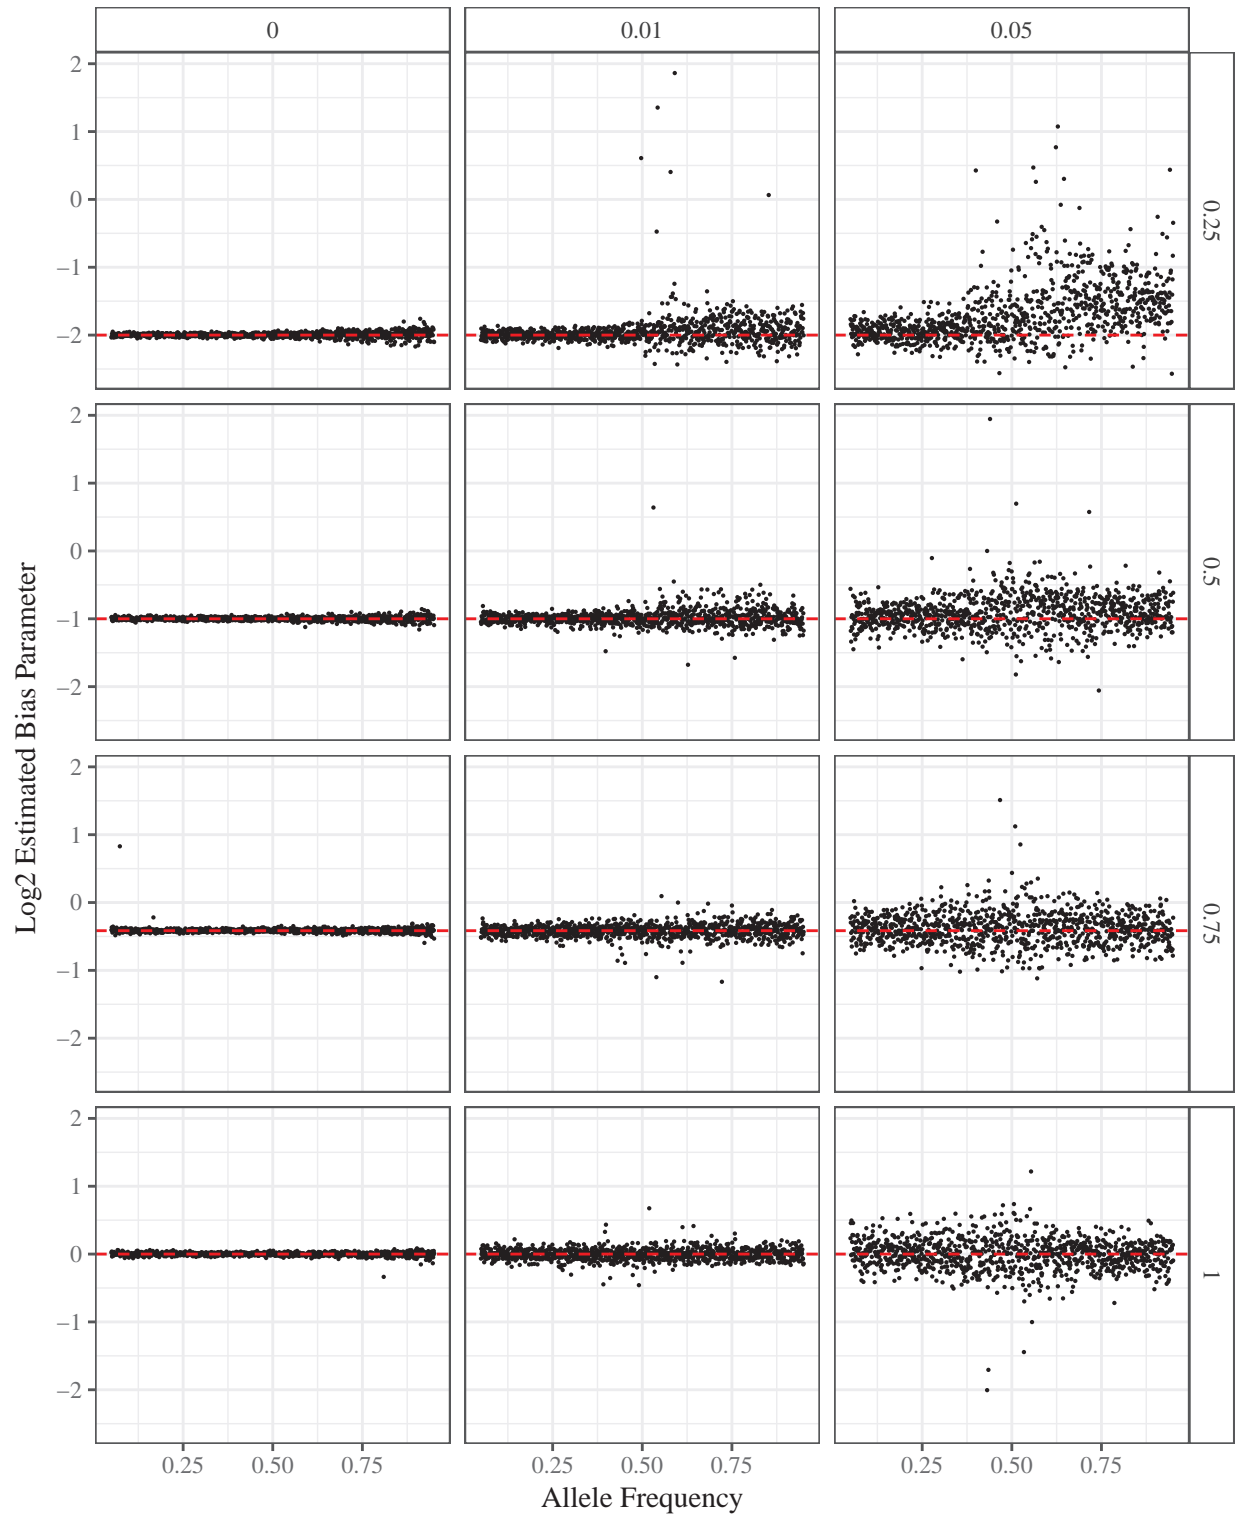

Figure 13: Allele frequency ( $x$ -axis) versus  $\log_2$  of the estimated bias ( $y$ -axis). The row facets distinguish different levels of bias and the column facets distinguish different levels of overdispersion.

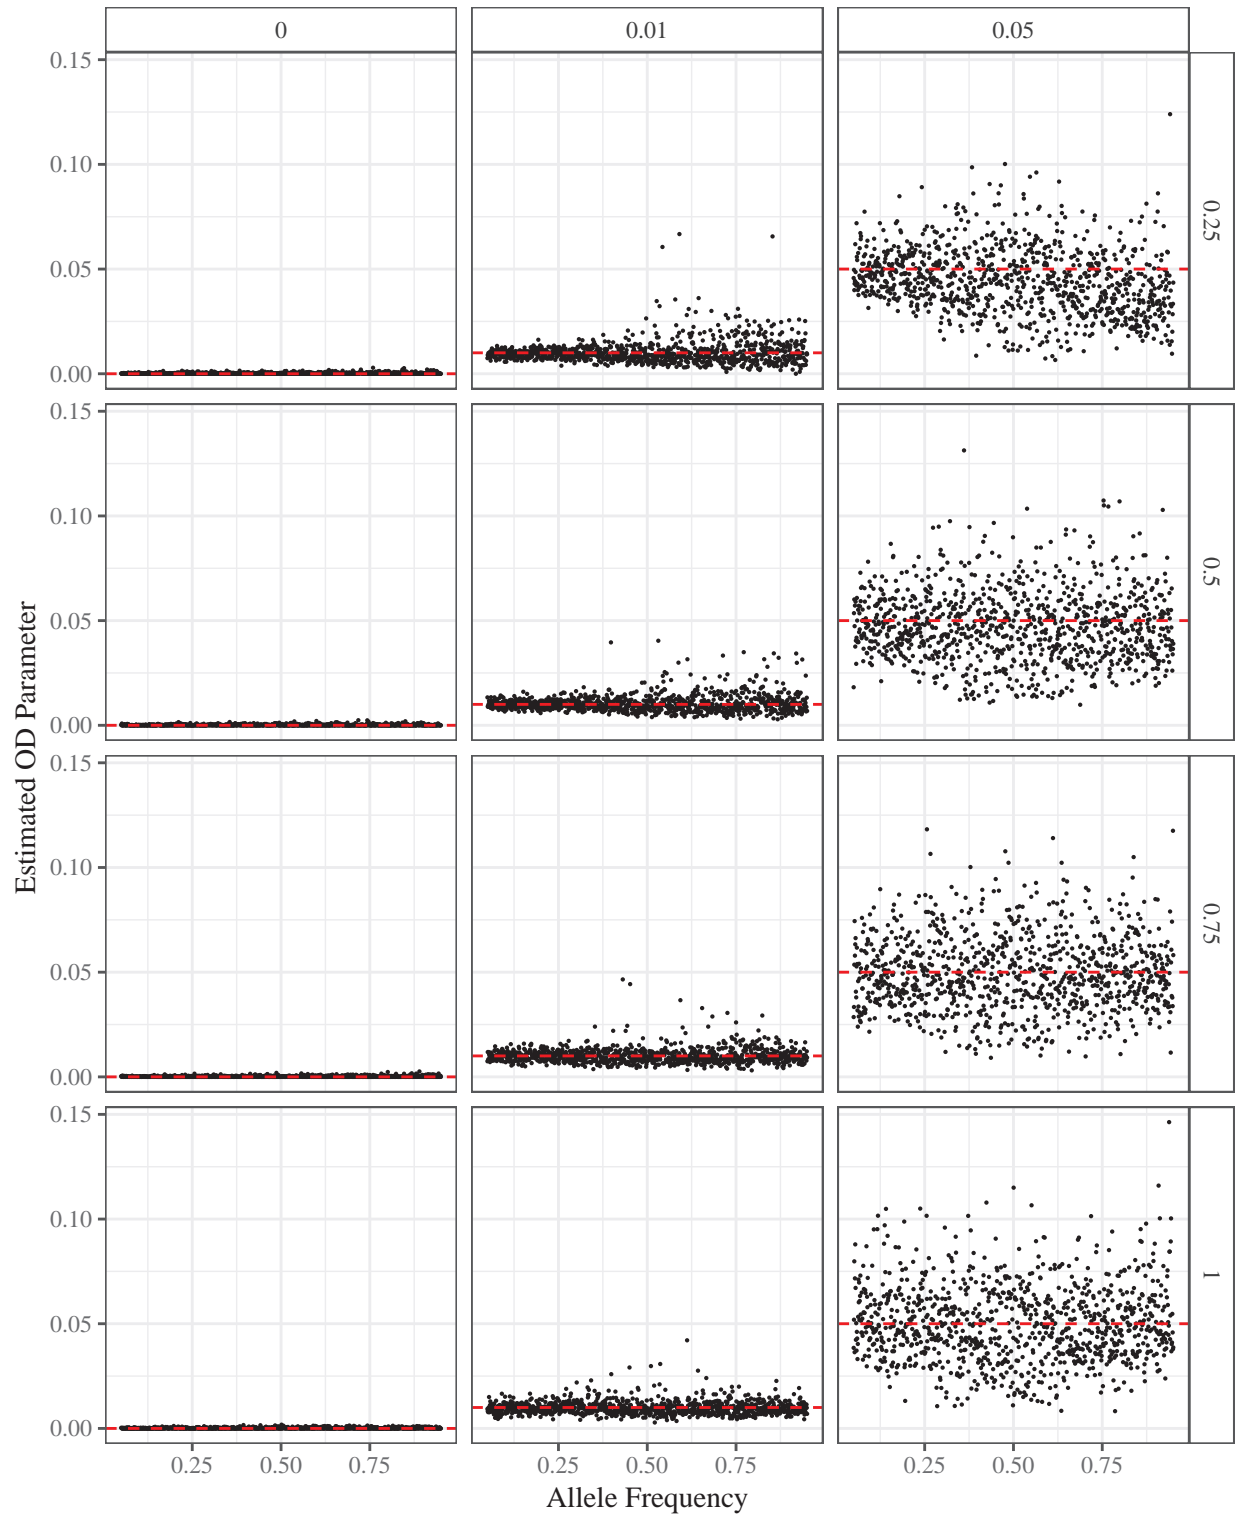

Figure 14: Allele frequency ( $x$ -axis) versus estimated overdispersion level ( $y$ -axis). The row facets distinguish different levels of bias and the column facets distinguish different levels of overdispersion.



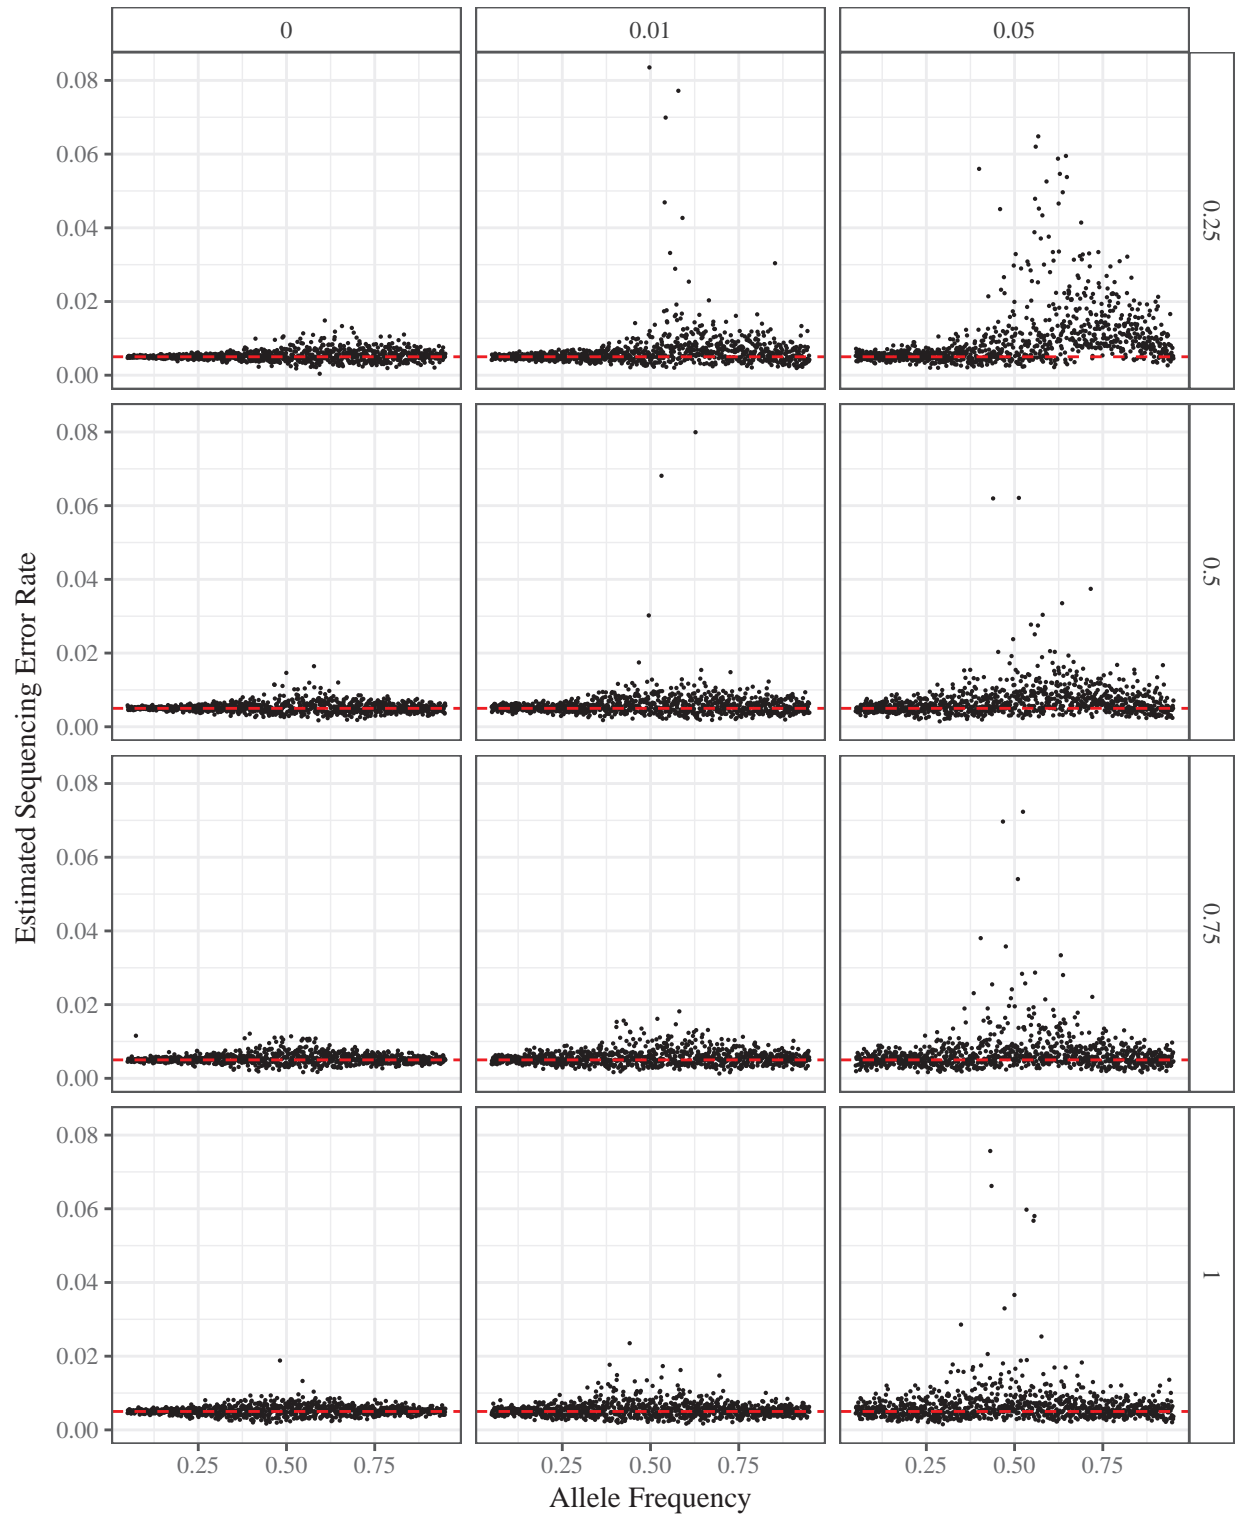

Figure 15: Allele frequency ( $x$ -axis) versus estimated sequencing error rate ( $y$ -axis). The row facets distinguish different levels of bias and the column facets distinguish different levels of overdispersion.

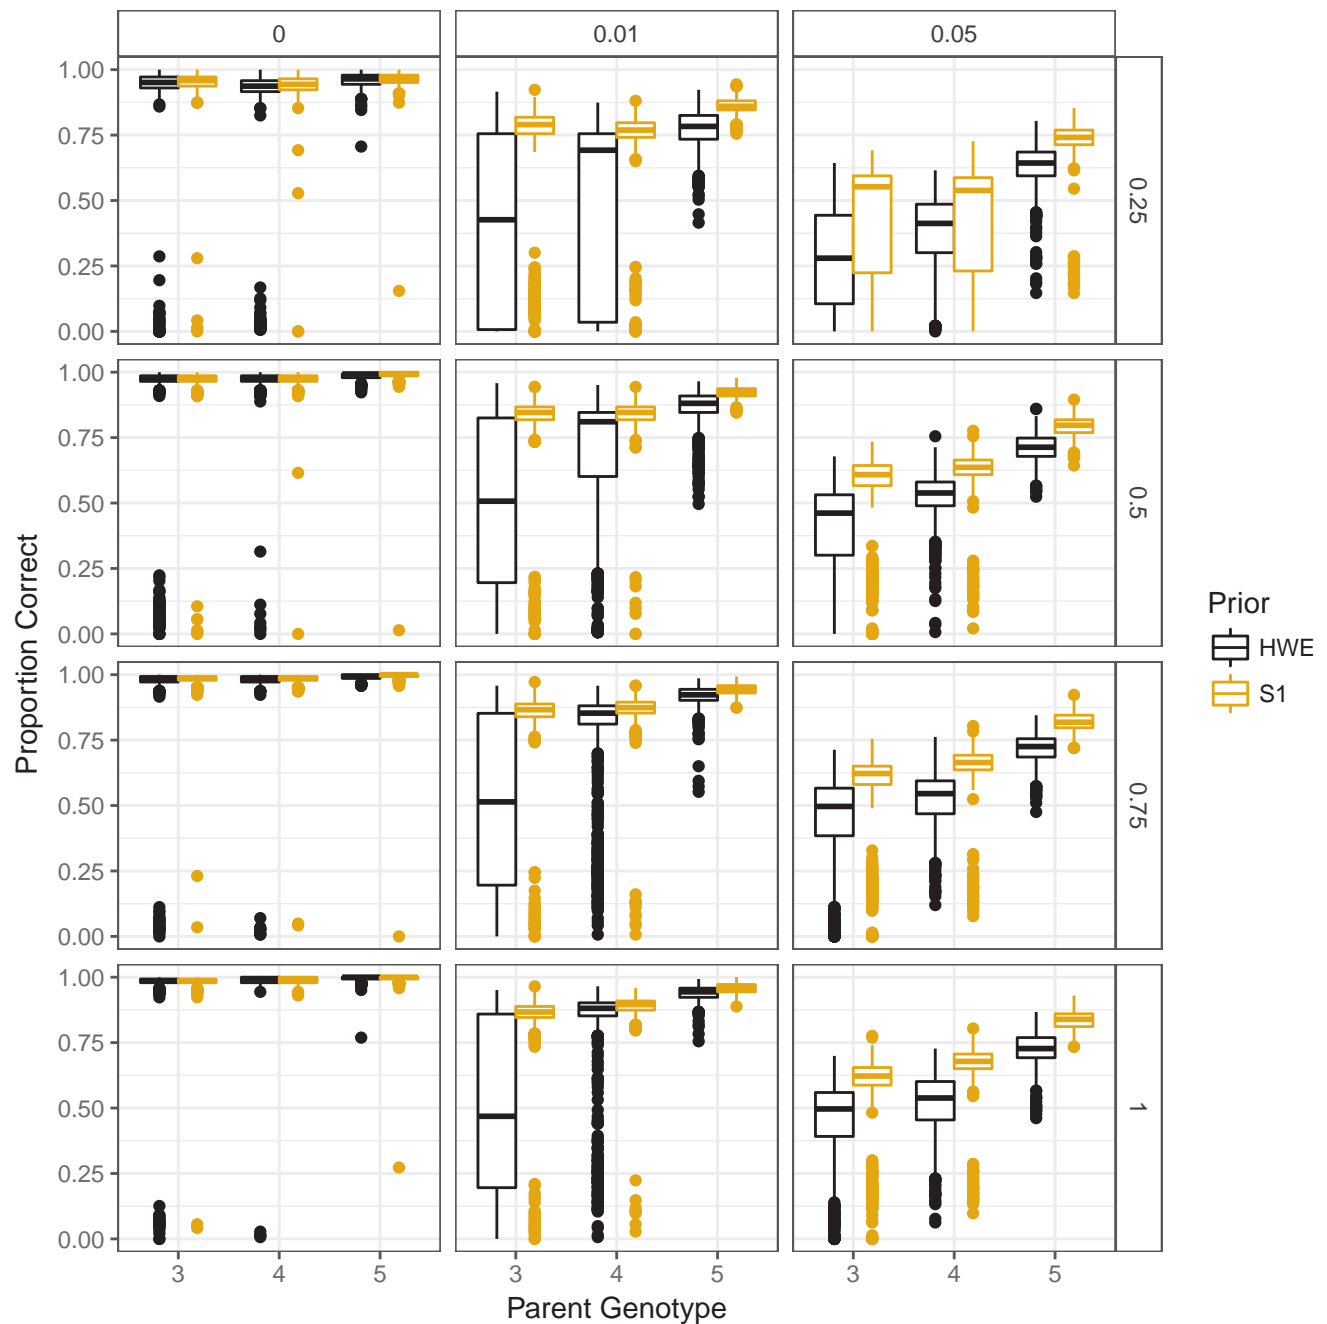

Figure 16: Box plots of the proportion of individuals genotyped correctly in an **updog** fit ( $y$ -axis) stratified by parent genotype ( $x$ -axis). Column facets distinguish different levels of sequencing error rates while row facets distinguish different levels of overdispersion. Orange box plots correctly assume the individuals are from an S1 population while black box plots incorrectly assume the population is in Hardy-Weinberg equilibrium.

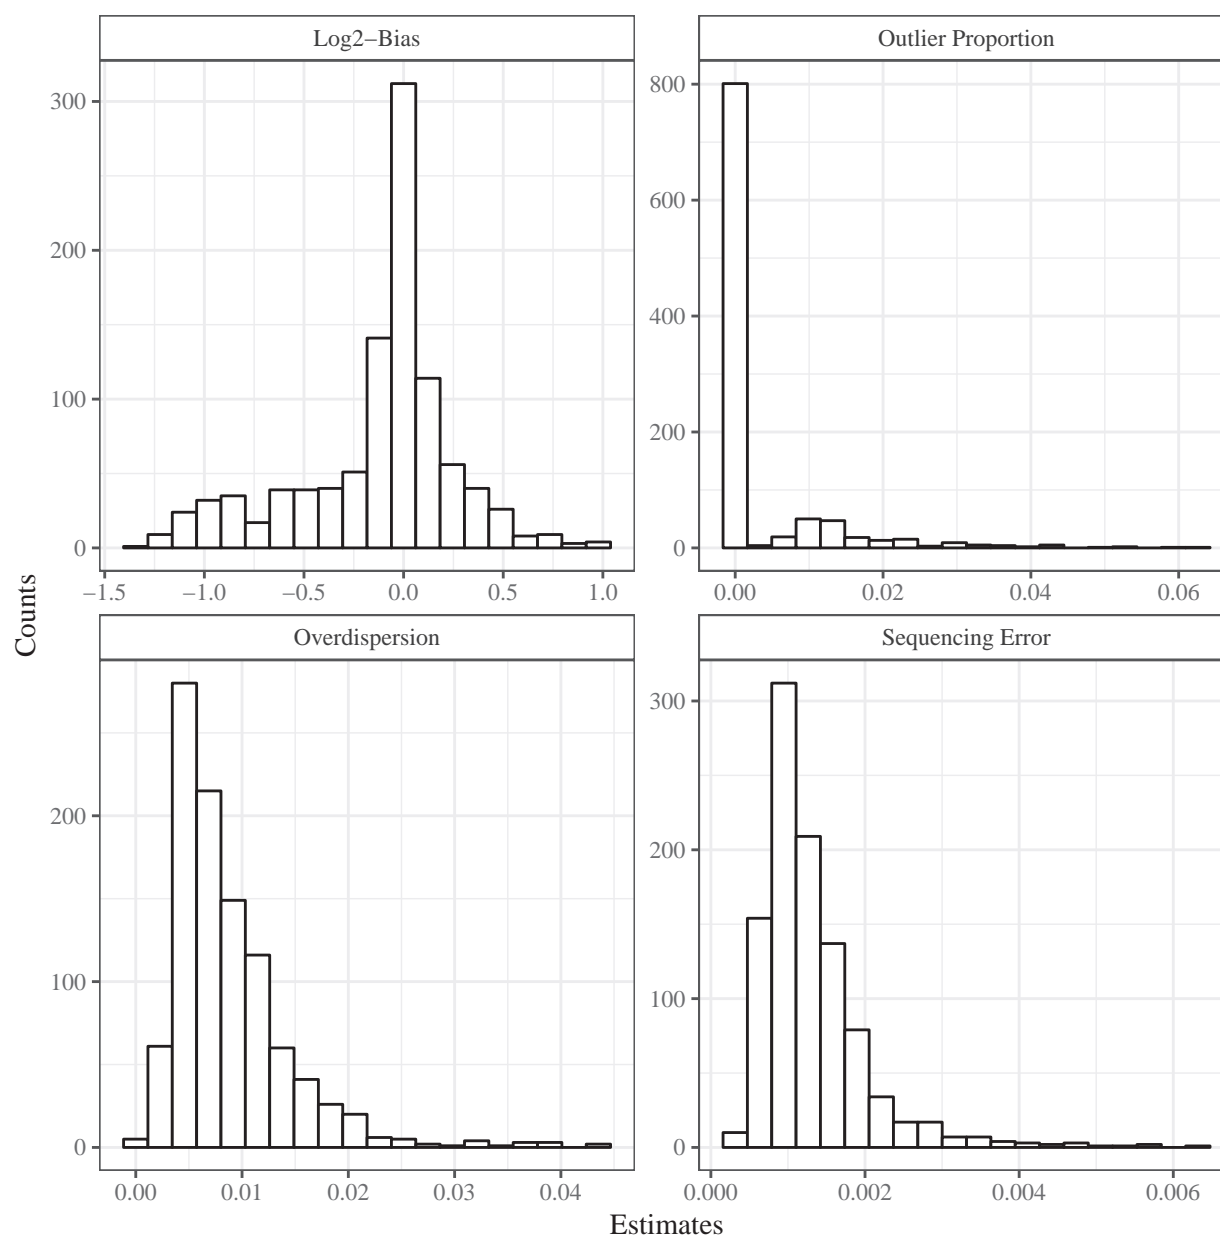

Figure 17: Histograms of updog estimates of parameters in 1000 SNPs from the data from Shirasawa et al. [2017].

## References

- Murray Aitkin and Granville Tunnicliffe Wilson. Mixture models, outliers, and the EM algorithm. *Technometrics*, 22(3):325–331, 1980. ISSN 00401706. doi: [10.2307/1268316](https://doi.org/10.2307/1268316).
- Nathan A. Baird, Paul D. Etter, Tressa S. Atwood, Mark C. Currey, Anthony L. Shiver, Zachary A. Lewis, Eric U. Selker, William A. Cresko, and Eric A. Johnson. Rapid SNP discovery and genetic mapping using sequenced RAD markers. *PLOS ONE*, 3(10):1–7, 10 2008. doi: [10.1371/journal.pone.0003376](https://doi.org/10.1371/journal.pone.0003376).
- David J Balding and Richard A Nichols. A method for quantifying differentiation between populations at multi-allelic loci and its implications for investigating identity and paternity. In Bruce S Weir, editor, *Human identification: The use of DNA markers*, pages 3–12. Springer, 1995.
- David J Balding and Richard A Nichols. Significant genetic correlations among caucasians at forensic DNA loci. *Heredity*, 78(6):583–589, 1997. doi: [10.1038/sj.hdy.6881750](https://doi.org/10.1038/sj.hdy.6881750).
- Norma Bargary, J. Hinde, and A. Augusto F. Garcia. Finite mixture model clustering of SNP data. In Gilbert MacKenzie and Defen Peng, editors, *Statistical Modelling in Biostatistics and Bioinformatics: Selected Papers*, pages 139–157. Springer International Publishing, 2014. ISBN 978-3-319-04579-5. doi: [10.1007/978-3-319-04579-5\\_11](https://doi.org/10.1007/978-3-319-04579-5_11).
- Paul D. Blischak, Laura S. Kubatko, and Andrea D. Wolfe. Accounting for genotype uncertainty in the estimation of allele frequencies in autopolyploids. *Molecular Ecology Resources*, 16(3):742–754, 2016. ISSN 1755-0998. doi: [10.1111/1755-0998.12493](https://doi.org/10.1111/1755-0998.12493).
- Paul D Blischak, Laura S Kubatko, and Andrea D Wolfe. SNP genotyping and parameter estimation in polyploids using low-coverage sequencing data. *Bioinformatics*, 34(3):407–415, 2018. doi: [10.1093/bioinformatics/btx587](https://doi.org/10.1093/bioinformatics/btx587).
- Stephen Byrne, Adrian Czaban, Bruno Studer, Frank Panitz, Christian Bendixen, and Torben Asp. Genome wide allele frequency fingerprints (GWAFFs) of populations via genotyping by sequencing. *PLOS ONE*, 8(3):1–10, 03 2013. doi: [10.1371/journal.pone.0057438](https://doi.org/10.1371/journal.pone.0057438).
- Nancy Chen, Cristopher V Van Hout, Srikanth Gottipati, and Andrew G Clark. Using Mendelian inheritance to improve high-throughput SNP discovery. *Genetics*, 198(3):847–857, 2014. doi: [10.1534/genetics.114.169052](https://doi.org/10.1534/genetics.114.169052).
- Martin J. Crowder. Inference about the intraclass correlation coefficient in the beta-binomial ANOVA for proportions. *Journal of the Royal Statistical Society. Series B (Methodological)*, 41(2):230–234, 1979. ISSN 00359246. URL <http://www.jstor.org/stable/2985037>.
- John W Davey, Paul A Hohenlohe, Paul D Etter, Jason Q Boone, Julian M Catchen, and Mark L Blaxter. Genome-wide genetic marker discovery and genotyping using next-generation sequencing. *Nature Reviews Genetics*, 12(7):499–510, 2011. doi: [10.1038/nrg3012](https://doi.org/10.1038/nrg3012).
- Robert J. Elshire, Jeffrey C. Glaubitz, Qi Sun, Jesse A. Poland, Ken Kawamoto, Edward S. Buckler, and Sharon E. Mitchell. A robust, simple genotyping-by-sequencing (GBS) approach for high diversity species. *PLOS ONE*, 6(5):1–10, 05 2011. doi: [10.1371/journal.pone.0019379](https://doi.org/10.1371/journal.pone.0019379).
- Antonio AF Garcia, Marcelo Mollinari, Thiago G Marconi, Oliver R Serang, Renato R Silva, Maria LC Vieira, Renato Vicentini, Estela A Costa, Melina C Mancini, Melissa OS Garcia, et al. SNP genotyping allows an in-depth characterisation of the genome of sugarcane and other complex autopolyploids. *Scientific reports*, 3:3399, 2013. doi: [10.1038/srep03399](https://doi.org/10.1038/srep03399).
- Erik Garrison and Gabor Marth. Haplotype-based variant detection from short-read sequencing. *arXiv preprint arXiv:1207.3907*, 2012. URL <https://arxiv.org/abs/1207.3907>.

- Jeffrey C Glaubitz, Terry M Casstevens, Fei Lu, James Harriman, Robert J Elshire, Qi Sun, and Edward S Buckler. TASSEL-GBS: a high capacity genotyping by sequencing analysis pipeline. *PLoS one*, 9(2):e90346, 2014. doi: [10.1371/journal.pone.0090346](https://doi.org/10.1371/journal.pone.0090346).
- Fabian Grandke, Priyanka Singh, Henri C. M. Heuven, Jorn R. de Haan, and Dirk Metzler. Advantages of continuous genotype values over genotype classes for GWAS in higher polyploids: a comparative study in hexaploid chrysanthemum. *BMC Genomics*, 17(1):672, Aug 2016. ISSN 1471-2164. doi: [10.1186/s12864-016-2926-5](https://doi.org/10.1186/s12864-016-2926-5).
- Yongtao Guan and Matthew Stephens. Practical issues in imputation-based association mapping. *PLOS Genetics*, 4(12):1–11, 12 2008. doi: [10.1371/journal.pgen.1000279](https://doi.org/10.1371/journal.pgen.1000279).
- CA Hackett and LB Broadfoot. Effects of genotyping errors, missing values and segregation distortion in molecular marker data on the construction of linkage maps. *Heredity*, 90(1):33–38, 2003. doi: [10.1038/sj.hdy.6800173](https://doi.org/10.1038/sj.hdy.6800173).
- Ali S. Hadi and Jeffrey S. Simonoff. Procedures for the identification of multiple outliers in linear models. *Journal of the American Statistical Association*, 88(424):1264–1272, 1993. doi: [10.1080/01621459.1993.10476407](https://doi.org/10.1080/01621459.1993.10476407).
- Peter J. Huber. Robust estimation of a location parameter. *Ann. Math. Statist.*, 35(1):73–101, 03 1964. doi: [10.1214/aoms/1177703732](https://doi.org/10.1214/aoms/1177703732).
- Changsoo Kim, Hui Guo, Wenqian Kong, Rahul Chandnani, Lan-Shuan Shuang, and Andrew H Paterson. Application of genotyping by sequencing technology to a variety of crop breeding programs. *Plant Science*, 242:14–22, 2016. doi: [10.1016/j.plantsci.2015.04.016](https://doi.org/10.1016/j.plantsci.2015.04.016).
- Heng Li. A statistical framework for SNP calling, mutation discovery, association mapping and population genetical parameter estimation from sequencing data. *Bioinformatics*, 27(21):2987, 2011. doi: [10.1093/bioinformatics/btr509](https://doi.org/10.1093/bioinformatics/btr509).
- Xuehui Li, Yanling Wei, Ananta Acharya, Qingzhen Jiang, Junmei Kang, and E. Charles Brummer. A saturated genetic linkage map of autotetraploid alfalfa (*Medicago sativa* L.) developed using genotyping-by-sequencing is highly syntenous with the *Medicago truncatula* genome. *G3: Genes, Genomes, Genetics*, 4(10):1971–1979, 2014. doi: [10.1534/g3.114.012245](https://doi.org/10.1534/g3.114.012245).
- Yun Li, Carlo Sidore, Hyun Min Kang, Michael Boehnke, and Gonalo R Abecasis. Low-coverage sequencing: implications for design of complex trait association studies. *Genome research*, 2011. doi: [10.1101/gr.117259.110](https://doi.org/10.1101/gr.117259.110).
- Haijun Liu, Xin Luo, Luyao Niu, Yingjie Xiao, Lu Chen, Jie Liu, Xiaqing Wang, Minliang Jin, Wenqiang Li, Qinghua Zhang, and Jianbing Yan. Distant eQTLs and non-coding sequences play critical roles in regulating gene expression and quantitative trait variation in maize. *Molecular Plant*, 10(3):414 – 426, 2017. ISSN 1674-2052. doi: [10.1016/j.molp.2016.06.016](https://doi.org/10.1016/j.molp.2016.06.016).
- Fei Lu, Alexander E. Lipka, Jeff Glaubitz, Rob Elshire, Jerome H. Cherney, Michael D. Casler, Edward S. Buckler, and Denise E. Costich. Switchgrass genomic diversity, ploidy, and evolution: novel insights from a network-based SNP discovery protocol. *PLOS Genetics*, 9(1):1–14, 01 2013. doi: [10.1371/journal.pgen.1003215](https://doi.org/10.1371/journal.pgen.1003215).
- Takahiro Maruki and Michael Lynch. Genotype calling from population-genomic sequencing data. *G3: Genes, Genomes, Genetics*, 7(5):1393–1404, 2017. doi: [10.1534/g3.117.039008](https://doi.org/10.1534/g3.117.039008).
- Susan McCallum, Julie Graham, Linzi Jorgensen, Lisa J. Rowland, Nahla V. Bassil, James F. Hancock, Edmund J. Wheeler, Kelly Vining, Jesse A. Poland, James W. Olmstead, Emily Buck, Claudia Wiedow, Eric Jackson, Allan Brown, and Christine A. Hackett. Construction of a SNP and SSR linkage map

- in autotetraploid blueberry using genotyping by sequencing. *Molecular Breeding*, 36(4):41, 2016. ISSN 1572-9788. doi: [10.1007/s11032-016-0443-5](https://doi.org/10.1007/s11032-016-0443-5).
- Aaron McKenna, Matthew Hanna, Eric Banks, Andrey Sivachenko, Kristian Cibulskis, Andrew Kernytsky, Kiran Garimella, David Altshuler, Stacey Gabriel, Mark Daly, et al. The genome analysis toolkit: a MapReduce framework for analyzing next-generation DNA sequencing data. *Genome research*, 20(9): 1297–1303, 2010. doi: [10.1101/gr.107524.110](https://doi.org/10.1101/gr.107524.110).
- Marcelo Mollinari and Oliver Serang. Quantitative SNP genotyping of polyploids with MassARRAY and other platforms. In Jacqueline Batley, editor, *Plant Genotyping: Methods and Protocols*, pages 215–241. Springer New York, New York, NY, 2015. ISBN 978-1-4939-1966-6. doi: [10.1007/978-1-4939-1966-6\\_17](https://doi.org/10.1007/978-1-4939-1966-6_17).
- Rasmus Nielsen, Joshua S Paul, Anders Albrechtsen, and Yun S Song. Genotype and SNP calling from next-generation sequencing data. *Nature Reviews Genetics*, 12(6):443–451, 2011. doi: [10.1038/nrg2986](https://doi.org/10.1038/nrg2986).
- Sarah P Otto and Jeannette Whitton. Polyploid incidence and evolution. *Annual review of genetics*, 34(1): 401–437, 2000. doi: [10.1146/annurev.genet.34.1.401](https://doi.org/10.1146/annurev.genet.34.1.401).
- Brant K. Peterson, Jesse N. Weber, Emily H. Kay, Heidi S. Fisher, and Hopi E. Hoekstra. Double digest RADseq: an inexpensive method for de novo SNP discovery and genotyping in model and non-model species. *PLOS ONE*, 7(5):1–11, 05 2012. doi: [10.1371/journal.pone.0037135](https://doi.org/10.1371/journal.pone.0037135).
- R Core Team. *R: A Language and Environment for Statistical Computing*. R Foundation for Statistical Computing, Vienna, Austria, 2017. URL <https://www.R-project.org/>.
- Martin P. Schilling, Paul G. Wolf, Aaron M. Duffy, Hardeep S. Rai, Carol A. Rowe, Bryce A. Richardson, and Karen E. Mock. Genotyping-by-sequencing for populus population genomics: an assessment of genome sampling patterns and filtering approaches. *PLOS ONE*, 9(4):1–9, 04 2014. doi: [10.1371/journal.pone.0095292](https://doi.org/10.1371/journal.pone.0095292).
- Cari A. Schmitz Carley, Joseph J. Coombs, David S. Douches, Paul C. Bethke, Jiwan P. Palta, Richard G. Novy, and Jeffrey B. Endelman. Automated tetraploid genotype calling by hierarchical clustering. *Theoretical and Applied Genetics*, 130(4):717–726, 2017. ISSN 1432-2242. doi: [10.1007/s00122-016-2845-5](https://doi.org/10.1007/s00122-016-2845-5).
- Oliver Serang, Marcelo Mollinari, and Antonio Augusto Franco Garcia. Efficient exact maximum a posteriori computation for Bayesian SNP genotyping in polyploids. *PLOS ONE*, 7(2):1–13, 02 2012. doi: [10.1371/journal.pone.0030906](https://doi.org/10.1371/journal.pone.0030906).
- Kenta Shirasawa, Masaru Tanaka, Yasuhiro Takahata, Daifu Ma, Qinghe Cao, Qingchang Liu, Hong Zhai, Sang-Soo Kwak, Jae Cheol Jeong, Ung-Han Yoon, et al. A high-density SNP genetic map consisting of a complete set of homologous groups in autohexaploid sweetpotato (*Ipomoea batatas*). *Scientific Reports*, 7, 2017. doi: [10.1038/srep44207](https://doi.org/10.1038/srep44207).
- J. G. Skellam. A probability distribution derived from the binomial distribution by regarding the probability of success as variable between the sets of trials. *Journal of the Royal Statistical Society. Series B (Methodological)*, 10(2):257–261, 1948. ISSN 00359246. URL <http://www.jstor.org/stable/2983779>.
- Douglas E Soltis, Clayton J Visger, and Pamela S Soltis. The polyploidy revolution then...and now: Stebbins revisited. *American Journal of Botany*, 101(7):1057–1078, 2014. doi: [10.3732/ajb.1400178](https://doi.org/10.3732/ajb.1400178).
- Pamela S. Soltis and Douglas E. Soltis. The role of genetic and genomic attributes in the success of polyploids. *Proceedings of the National Academy of Sciences*, 97(13):7051–7057, 2000. doi: [10.1073/pnas.97.13.7051](https://doi.org/10.1073/pnas.97.13.7051).
- Jennifer Spindel, Mark Wright, Charles Chen, Joshua Cobb, Joseph Gage, Sandra Harrington, Mathias Lorieux, Nourollah Ahmadi, and Susan McCouch. Bridging the genotyping gap: using genotyping by sequencing (GBS) to add high-density SNP markers and new value to traditional bi-parental mapping and breeding populations. *Theoretical and Applied Genetics*, 126(11):2699–2716, 2013. ISSN 1432-2242. doi: [10.1007/s00122-013-2166-x](https://doi.org/10.1007/s00122-013-2166-x).

- Jennifer Spindel, Hasina Begum, Deniz Akdemir, Parminder Virk, Bertrand Collard, Edilberto Redoña, Gary Atlin, Jean-Luc Jannink, and Susan R. McCouch. Genomic selection and association mapping in rice (*Oryza sativa*): effect of trait genetic architecture, training population composition, marker number and statistical model on accuracy of rice genomic selection in elite, tropical rice breeding lines. *PLOS Genetics*, 11(2):1–25, 02 2015. doi: [10.1371/journal.pgen.1004982](https://doi.org/10.1371/journal.pgen.1004982).
- Jacob A. Tennesen, Rajanikanth Govindarajulu, Tia-Lynn Ashman, and Aaron Liston. Evolutionary origins and dynamics of octoploid strawberry subgenomes revealed by dense targeted capture linkage maps. *Genome Biology and Evolution*, 6(12):3295, 2014. doi: [10.1093/gbe/evu261](https://doi.org/10.1093/gbe/evu261).
- Joshua A Udall and Jonathan F Wendel. Polyploidy and crop improvement. *Crop Science*, 46(Supplement\_1): S–3, 2006. doi: [10.2135/cropsci2006.07.0489tpg](https://doi.org/10.2135/cropsci2006.07.0489tpg).
- Bryce Van De Geijn, Graham McVicker, Yoav Gilad, and Jonathan K Pritchard. WASP: allele-specific software for robust molecular quantitative trait locus discovery. *Nature methods*, 12(11):1061–1063, 2015. doi: [10.1038/nmeth.3582](https://doi.org/10.1038/nmeth.3582).
- Roeland E. Voorrips, Gerrit Gort, and Ben Vosman. Genotype calling in tetraploid species from bi-allelic marker data using mixture models. *BMC Bioinformatics*, 12(1):172, 2011. ISSN 1471-2105. doi: [10.1186/1471-2105-12-172](https://doi.org/10.1186/1471-2105-12-172).
- Baiyu Zhou and Alice S. Whittemore. Improving sequence-based genotype calls with linkage disequilibrium and pedigree information. *Ann. Appl. Stat.*, 6(2):457–475, 06 2012. doi: [10.1214/11-AOAS527](https://doi.org/10.1214/11-AOAS527).
